# Supplementary material
Source: PubMed Central journal article supplement (PMC3859160)
Supplement: 10-1055-s-0033-1350713-sup_gf661.pdf [file 10-1055-s-0033-1350713-sup_gf661.pdf]

# S3-Leitlinie Diagnostik, Therapie und Nachsorge maligner Ovarialtumoren

Kurzversion 1.0 – AWMF-Registernummer: 032/035OL, Juni 2013

S3-Guideline on Diagnostics, Therapy and Follow-up of Malignant Ovarian Tumours  
Short version 1.0 – AWMF registration number: 032/035OL, June 2013

|                  |                                                                                                                                                                                                                                                                                                                                                                                                                     |
|------------------|---------------------------------------------------------------------------------------------------------------------------------------------------------------------------------------------------------------------------------------------------------------------------------------------------------------------------------------------------------------------------------------------------------------------|
| <b>Autoren</b>   | U. Wagner, P. Harter, F. Hilpert, S. Mahner, A. Reuß, A. du Bois, E. Petru, W. Meier, P. Ortner, K. König, K. Lindel, D. Grab, P. Piso, O. Ortmann, I. Runnebaum, J. Pfisterer, D. Lüftner, N. Frickhofen, F. Grünwald, B. O. Maier, J. Diebold, S. Hauptmann, F. Kommoss, G. Emons, B. Radeleff, M. Gebhardt, N. Arnold, G. Calaminus, I. Weisse, J. Weis, J. Sehouli, D. Fink, A. Burges, A. Hasenburg, C. Eggert |
| <b>Institute</b> | Die Institutsangaben sind in Kapitel 1.8.1 gelistet.                                                                                                                                                                                                                                                                                                                                                                |

## 1 Informationen zu dieser Kurzversion

### 1.1 Herausgeber

Leitlinienprogramm Onkologie der AWMF (OL), Deutschen Krebsgesellschaft e.V. (DKG) und Deutschen Krebshilfe e.V. (DKH).

### 1.2 Federführende Fachgesellschaft

Deutsche Gesellschaft für Gynäkologie und Geburtshilfe (DGGG).

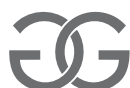

### 1.3 Finanzierung der Leitlinie

Diese Leitlinie wurde von der Deutschen Krebshilfe im Rahmen des Leitlinienprogramms Onkologie gefördert.

### 1.4 Kontakt

Office Leitlinienprogramm Onkologie  
c/o Deutsche Krebsgesellschaft e.V.  
Kuno-Fischer-Straße 8  
14057 Berlin  
leitlinienprogramm@krebsgesellschaft.de  
www.leitlinienprogramm-onkologie.de

### 1.5 Zitierweise

Leitlinienprogramm Onkologie (Deutsche Krebsgesellschaft, Deutsche Krebshilfe, AWMF): S3-Leitlinie Diagnostik, Therapie und Nachsorge maligner Ovarialtumoren, Kurzversion 1.0 (2013), AWMF Registrierungsnummer: 032-035OL, <http://leitlinienprogramm-onkologie.de/Leitlinien.7.0.html>

## 1.6 Besonderer Hinweis

Die Medizin unterliegt einem fortwährenden Entwicklungsprozess, sodass alle Angaben, insbesondere zu diagnostischen und therapeutischen Verfahren, immer nur dem Wissensstand zurzeit der Drucklegung der VersorgungsLeitlinie entsprechen können. Hinsichtlich der angegebenen Empfehlungen zur Therapie und der Auswahl sowie Dosierung von Medikamenten wurde die größtmögliche Sorgfalt beachtet. Gleichwohl werden die Benutzer aufgefordert, die Beipackzettel und Fachinformationen der Hersteller zur Kontrolle heranzuziehen und im Zweifelsfall einen Spezialisten zu konsultieren. Fragliche Unstimmigkeiten sollen bitte im Allgemeinen Interesse der OL-Redaktion mitgeteilt werden.

**Der Benutzer selbst bleibt verantwortlich für jede diagnostische und therapeutische Applikation, Medikation und Dosierung.**

In dieser Leitlinie sind eingetragene Warenzeichen (geschützte Warennamen) nicht besonders kenntlich gemacht. Es kann also aus dem Fehlen eines entsprechenden Hinweises nicht geschlossen werden, dass es sich um einen freien Warennamen handelt.

Die Leitlinie ist in allen ihren Teilen urheberrechtlich geschützt. Jede Verwertung außerhalb der Bestimmung des Urhebergesetzes ist ohne schriftliche Zustimmung der OL-Redaktion unzulässig und strafbar. Kein Teil des Werkes darf in irgendeiner Form ohne schriftliche Genehmigung der OL-Redaktion reproduziert werden. Dies gilt insbesondere für Vervielfältigungen, Übersetzungen, Mikroverfilmungen und die Einspeicherung, Nutzung und Verwertung in elektronischen Systemen, Intranets und dem Internet.

## Bibliografie

**DOI** <http://dx.doi.org/10.1055/s-0033-1350713>  
Geburtsh Frauenheilk 2013; 73: 1–16 © Georg Thieme  
Verlag KG Stuttgart · New York ·  
ISSN 0016-5751

## Korrespondenzadresse

**Prof. Dr. Uwe Wagner**  
Uni-Frauenklinik  
Baldingerstraße  
35043 Marburg

## DGGG-Leitliniensekretariat

**Prof. Dr. med. Matthias W. Beckmann, DGGG-Leitlinienbeauftragter**  
Frauenklinik  
Universitätsklinikum Erlangen  
Universitätsstraße 21–23  
91054 Erlangen  
Tel.: 091 31-85-33507/44063  
Fax: 091 31-85-33951

## 1.7 Weitere Leitliniendokumente

Die Inhalte dieser Kurzversion beziehen sich auf die Langversion der S3-Leitlinie Diagnostik, Therapie und Nachsorge maligner Ovarialtumoren, welche über folgende Seiten zugänglich ist

- ▶ AWMF (<http://www.awmf.org/leitlinien/aktuelle-leitlinien.html>)
- ▶ Leitlinienprogramm Onkologie <http://www.leitlinienprogramm-onkologie.de/OL/leitlinien.html>
- ▶ Deutsche Krebsgesellschaft [http://www.krebsgesellschaft.de/wub\\_llevidenzbasiert\\_120884.html](http://www.krebsgesellschaft.de/wub_llevidenzbasiert_120884.html)
- ▶ Deutsche Krebshilfe (<http://www.krebshilfe.de/>)
- ▶ Guidelines International Network ([www.g-i-n.net](http://www.g-i-n.net))
- ▶ Beteiligte Fachgesellschaften (z.B. <http://www.dggg.de/leitlinien/>)

Neben der Kurzversion gibt es folgende ergänzende Dokumente:

- ▶ Leitlinienreport zur Erstellung der Leitlinie
- ▶ Langversion
- ▶ Patientenleitlinie

Alle diese Dokumente werden ebenfalls auf den oben genannten Homepages abrufbar sein.

## 1.8 Verantwortlichkeiten

### 1.8.1 Autoren dieser Leitlinie

#### Redaktionsteam

- ▶ Prof. Dr. Uwe Wagner (Koordinator, DGGG), Uni-Frauenklinik, Baldingerstraße, 35043 Marburg
- ▶ Dr. Philipp Harter (DGGG), Kliniken Essen-Mitte, Henricistraße 92, 45136 Essen
- ▶ PD Dr. Felix Hilpert (DGGG), Universitätsklinikum Schleswig Holstein, Campus Kiel, Klinik für Gynäkologie und Geburtshilfe, Arnold-Heller-Straße 3, Haus 24, 24105 Kiel
- ▶ PD Dr. Sven Mahner (DGGG), Universitätsklinikum Hamburg-Eppendorf, Klinik für Gynäkologie, Martinistraße 52, 20246 Hamburg
- ▶ Alexander Reuß, Koordinierungszentrum für Klinische Studien, Philipps-Universität Marburg, Karl-von-Frisch-Straße 4, 35043 Marburg

#### Beteiligte Fachgesellschaften und Autoren

- ▶ Prof. Dr. Andreas du Bois – Arbeitsgemeinschaft Gynäkologische Onkologie e.V. (AGO)
- ▶ Prof. Dr. Edgar Petru – Arbeitsgemeinschaft für Gynäkologische Onkologie Österreich (AGO AT)
- ▶ Prof. Dr. Werner Meier – AGO Studiengruppe
- ▶ Dr. Petra Ortner – Arbeitsgemeinschaft Supportive Maßnahmen in der Onkologie, Rehabilitation und Sozialmedizin (ASORS)
- ▶ Dr. Klaus König – Berufsverband der Frauenärzte e.V. (BVF)
- ▶ PD Dr. Katja Lindel – Deutsche Gesellschaft für Radioonkologie (DEGRO)
- ▶ Prof. Dr. Dieter Grab – Deutsche Gesellschaft für Ultraschall in der Medizin e.V. (DEGUM)
- ▶ Prof. Dr. Pompiliu Piso – Deutsche Gesellschaft für Allgemein- u. Viszeralchirurgie (DGAV)
- ▶ Prof. Dr. Olaf Ortmann – Deutsche Gesellschaft für Endokrinologie (DGE)
- ▶ Prof. Dr. Ingo Runnebaum – Deutsche Gesellschaft für Gynäkologie und Geburtshilfe (DGGG)
- ▶ Prof. Dr. Jacobus Pfisterer – Deutsche Gesellschaft für Gynäkologie und Geburtshilfe (DGGG)
- ▶ PD Dr. Diana Lüftner – Deutsche Gesellschaft f. Hämatologie und Onkologie e.V. (DGHO)

- ▶ Prof. Dr. Norbert Frickhofen – Deutsche Gesellschaft für Innere Medizin e.V. (DEGIM)
- ▶ Prof. Dr. Frank Grünwald – Deutsche Gesellschaft für Nuklearmedizin e.V. (DGN)
- ▶ Dr. Bernd Oliver Maier – Deutsche Gesellschaft für Palliativmedizin e.V. (DGP)
- ▶ Prof. Dr. Joachim Diebold, Prof. Dr. Steffen Hauptmann, Prof. Dr. Friedrich Kommoss – Deutsche Gesellschaft für Pathologie e.V. (DGP)
- ▶ Prof. Dr. Günter Emons – Deutsche Menopausengesellschaft e.V. (DMG)
- ▶ Dr. Boris Radeleff – Deutsche Röntgengesellschaft (DRG)
- ▶ Marion Gebhardt (Patientinnenvertreterin) – Bundesverband der Frauenselbsthilfe nach Krebs e.V.
- ▶ Prof. Dr. Norbert Arnold – Deutsche Gesellschaft für Humangenetik (GfH)
- ▶ Dr. Gabriele Calaminus – Gesellschaft für Pädiatrische Onkologie und Hämatologie (GPOH)
- ▶ Isolde Weisse – Konferenz Onkologischer Kranken- und Kinderkrankenpflege (KOK)
- ▶ Prof. Dr. Joachim Weis – Arbeitsgemeinschaft für Psychosoziale Onkologie (PSO)
- ▶ Prof. Dr. Jalid Sehouli – Nord-Ostdeutsche Gesellschaft für Gynäkologische Onkologie (NOGGO)
- ▶ Prof. Dr. Daniel Fink – Schweizerische Gesellschaft für Gynäkologie und Geburtshilfe (SGGG)
- ▶ Dr. Alexander Burges – als Experte ad personam
- ▶ Prof. Dr. Annette Hasenburg – als Expertin ad personam
- ▶ Darüber beteiligte sich Dr. C. Eggert vom Medizinischen Dienst der Krankenversicherung in Hessen (MDK Hessen) an den Diskussionen der Konsensuskonferenzen als nicht stimmberechtigte Expertin.

#### Methodische Begleitung

1. durch das Leitlinienprogramm Onkologie
  - ▶ Prof. Dr. Ina Kopp, Marburg (AWMF)
  - ▶ Dr. Markus Follmann MPH MSc, Berlin (DKG)
  - ▶ Dipl.-Soz.Wiss Thomas Langer (DKG)
2. durch externe Auftragnehmer:
  - ▶ Koordinierungszentrum für Klinische Studien der Philipps Universität Marburg, A. Reuß, Dr. D. Lubbe
  - ▶ Bremer Institut für Präventionsforschung und Sozialmedizin (BIPS), Dr. K. Giersiepen
3. durch die federführende Fachgesellschaft:
  - ▶ Deutsche Gesellschaft für Gynäkologie und Geburtshilfe (DGGG), Prof. Dr. R. Kreienberg

## 2 Einführung

### 2.1 Adressaten

Die Zielorientierung der Leitlinie umfasst die Beratung von Hochrisikogruppen, die Diagnostik, die operative und systemische Therapie der frühen und fortgeschrittenen Stadien, sowie die Behandlung seltener histologischer Subtypen. Großer Wert wird auf die Nachsorge, Rehabilitationsmaßnahmen, palliative Therapie und psychoonkologische Betreuung gelegt. Die Empfehlungen richten sich an die behandelnden ärztlichen Fachkollegen sowohl im stationären als auch im ambulanten Bereich, Pflegeberufe und weitere medizinische Partner in der Behandlung der Patientinnen mit malignen Ovarialtumoren. Durch die eigenständigen Themenkomplexe Screening und Nachsorge sind auch nie-

dergelassene Ärzte wichtige Adressaten der Leitlinie. Darüber hinaus soll sie Betroffenen und Ratsuchenden zur Orientierung dienen und eine Grundlage für die im Aufbau befindlichen Gynäkologischen Krebszentren bilden.

Erstmals sind bei dieser Leitlinie auch die Fachgesellschaften aus der Schweiz und Österreich einbezogen, sodass sich der Geltungsbereich damit ausdehnt.

## 2.2 Grundlagen der Methodik

Die methodische Vorgehensweise bei der Erstellung der Leitlinie ist im Leitlinienreport dargelegt. Dieser ist im Internet z.B. auf den Seiten des Leitlinienprogramms Onkologie (<http://leitlinienprogramm-onkologie.de/Leitlinien.7.0.html>) und den Seiten der AWMF (<http://www.awmf.org/>) frei verfügbar.

### 2.2.1 Schema der Evidenzgraduierung nach SIGN

Zur Klassifikation des Verzerrungsrisikos der identifizierten Studien wurde in dieser Leitlinie das in **Tab. 1** aufgeführte System des Scottish Intercollegiate Guidelines Network (SIGN, Version 2009) verwendet (siehe <http://www.sign.ac.uk/pdf/sign50.pdf>).

**Tab. 1** Schema der Evidenzgraduierung nach SIGN (Version 2009).

| Grad | Beschreibung                                                                                                                                                                                                                                                                                                 |
|------|--------------------------------------------------------------------------------------------------------------------------------------------------------------------------------------------------------------------------------------------------------------------------------------------------------------|
| 1++  | qualitativ hochwertige Metaanalysen, systematische Übersichten von RCTs, oder RCTs mit sehr geringem Risiko systematischer Fehler (Bias)                                                                                                                                                                     |
| 1+   | gut durchgeführte Metaanalysen, systematische Übersichten von RCTs, oder RCTs mit geringem Risiko systematischer Fehler (Bias)                                                                                                                                                                               |
| 1–   | Metaanalysen, systematische Übersichten von RCTs, oder RCTs mit hohem Risiko systematischer Fehler (Bias)                                                                                                                                                                                                    |
| 2++  | qualitativ hochwertige systematische Übersichten von Fall-Kontroll- oder Kohortenstudien oder qualitativ hochwertige Fall-Kontroll- oder Kohortenstudien mit sehr niedrigem Risiko systematischer Verzerrungen (Confounding, Bias, „Chance“) und hoher Wahrscheinlichkeit, dass die Beziehung ursächlich ist |
| 2+   | gut durchgeführte Fall-Kontroll-Studien oder Kohortenstudien mit niedrigem Risiko systematischer Verzerrungen (Confounding, Bias, „Chance“) und moderater Wahrscheinlichkeit, dass die Beziehung ursächlich ist                                                                                              |
| 2–   | Fall-Kontroll-Studien oder Kohortenstudien mit einem hohen Risiko systematischer Verzerrungen (Confounding, Bias, „Chance“) und signifikantem Risiko, dass die Beziehung nicht ursächlich ist                                                                                                                |
| 3    | nicht analytische Studien, z.B. Fallberichte, Fallserien                                                                                                                                                                                                                                                     |
| 4    | Expertenmeinung                                                                                                                                                                                                                                                                                              |

### 2.2.2 Schema der Empfehlungsgraduierung

Die OL-Methodik sieht eine Vergabe von Empfehlungsgraden durch die Leitlinien-Autoren im Rahmen eines formalen Konsensusverfahrens vor. Dementsprechend wurde ein durch die AWMF moderierter, mehrteiliger nominaler Gruppenprozess durchgeführt.

In der Leitlinie werden zu allen evidenzbasierten Statements (siehe Kapitel 2.2.3) und Empfehlungen das Evidenzlevel (nach SIGN, siehe 2.2.1) der zugrunde liegenden Studien sowie Empfehlungen zusätzlich die Stärke der Empfehlung (Empfehlungsgrad) ausgewiesen. Hinsichtlich der Stärke der Empfehlung werden in dieser Leitlinie drei Empfehlungsgrade unterschieden (siehe **Tab. 2**), die sich auch in der Formulierung der Empfehlungen jeweils widerspiegeln.

**Tab. 2** Verwendete Empfehlungsgrade.

| Empfehlungsgrad | Beschreibung      | Syntax |
|-----------------|-------------------|--------|
| A               | starke Empfehlung | soll   |
| B               | Empfehlung        | sollte |
| O               | Empfehlung offen  | kann   |

### 2.2.3 Statements

Als Statements werden Darlegungen oder Erläuterungen von spezifischen Sachverhalten oder Fragestellungen ohne unmittelbare Handlungsaufforderung bezeichnet. Sie werden entsprechend der Vorgehensweise bei den Empfehlungen im Rahmen eines formalen Konsensusverfahrens verabschiedet und können entweder auf Studienergebnissen oder auf Expertenmeinungen beruhen.

### 2.2.4 Klinischer Konsenspunkt (KKP)

Statements/Empfehlungen, für die eine Bearbeitung auf der Grundlage von Expertenkonsens der Leitliniengruppe beschlossen wurde, sind als „Klinischer Konsenspunkt“ ausgewiesen. Für die Graduierung der klinischen Konsenspunkte wurden keine Symbole verwendet, die Stärke des Konsenspunktes ergibt sich aus der verwendeten Formulierung (soll/sollte/kann) entsprechend der Abstufung in **Tab. 2**.

### 2.2.5 Unabhängigkeit und Darlegung möglicher Interessenkonflikte

Die Deutsche Krebshilfe stellte über das Leitlinienprogramm Onkologie (OL) die finanziellen Mittel zur Verfügung. Diese Mittel wurden eingesetzt für Personalkosten, Büromaterial, Literaturbeschaffung und die Konsensuskonferenzen (Raummieten, Technik, Verpflegung, Moderatorenhonorare, Reisekosten der Teilnehmer). Die Reisekosten wurden entsprechend dem Bundes-Dienstreisegesetz bzw. nach den in der DKG üblichen Richtlinien erstattet. Die Erarbeitung der Leitlinie erfolgte in redaktioneller Unabhängigkeit von der finanzierenden Organisation. Alle Mitglieder legten während des Leitlinienprozesses eine schriftliche Erklärung zu eventuell bestehenden Interessenkonflikten vor. Die offengelegten Interessenkonflikte sind im Leitlinienreport zu dieser Leitlinie (<http://leitlinienprogramm-onkologie.de/Leitlinien.7.0.html>) aufgeführt. An dieser Stelle möchten wir allen Mitarbeitern für ihre ausschließlich ehrenamtliche Mitarbeit an dem Projekt danken.

### 2.2.6 Gültigkeitsdauer und Aktualisierungsverfahren

Die S3-Leitlinie ist bis zur nächsten Aktualisierung gültig, die Gültigkeitsdauer wird auf 3 Jahre geschätzt. Vorgesehen sind regelmäßige Aktualisierungen, bei dringendem Änderungsbedarf, werden diese gesondert publiziert. Kommentare und Hinweise für den Aktualisierungsprozess sind ausdrücklich erwünscht und können an die folgende Adresse gesendet werden:

Prof. Dr. Uwe Wagner, Klinik für Gynäkologie, gynäkologische Endokrinologie und Onkologie, Baldingerstraße, 35043 Marburg, Tel.: 06421–58–66211, Fax: 0642 158–68969, E-Mail: [wagneru@med.uni-marburg.de](mailto:wagneru@med.uni-marburg.de).

## 2.3 Verwendete Abkürzungen

| Abkürzung | Bedeutung                                                                      |
|-----------|--------------------------------------------------------------------------------|
| AUC       | Area under the Curve                                                           |
| EG        | Empfehlungsgrad, A = starke Empfehlung, B = Empfehlung, 0 = offene Empfehlung, |
| HIPEC     | hypertherme intraperitoneale Chemotherapie                                     |
| HT        | Hormontherapie                                                                 |
| KKP       | klinischer Konsenspunkt                                                        |
| LL        | Leitlinie                                                                      |
| LoE       | Level of Evidence                                                              |
| OL        | Leitlinienprogramm Onkologie                                                   |
| OP        | Operation                                                                      |
| ST        | Statement                                                                      |
| TVS       | Transvaginalsonografie                                                         |
| WHO       | Weltgesundheitsorganisation                                                    |

## 3 Epidemiologie, Früherkennung und Diagnostik

### 3.1 Früherkennung

| Nr.  | Empfehlungen/Statements                                                                                                                                             | EG  | LoE | Quellen                                    |
|------|---------------------------------------------------------------------------------------------------------------------------------------------------------------------|-----|-----|--------------------------------------------|
| 3.1. | Screening mit CA125 und TVS konnte bisher keine Reduktion der Mortalität nachweisen.                                                                                | ST  | 1++ | Leitlinien: [1, 2]<br>Primärstudien: [3–9] |
| 3.2. | Ein generelles Screening soll nicht durchgeführt werden.                                                                                                            | A   | 1++ | Leitlinien: [1, 2]<br>Primärstudien: [3–9] |
| 3.3. | Eine multidisziplinäre Beratung (Gynäkologe und Humangenetiker) und genetische Testung soll angeboten werden, wenn eine Patientin zu einer Risikopopulation gehört. | KKP |     |                                            |
| 3.4. | Screening mit CA125 und TVS konnte in Risikogruppen keine Reduktion der Mortalität nachweisen.                                                                      | ST  | 3   | Leitlinien: [1]<br>Primärstudien: [10–13]  |
| 3.5. | Ein Screening in Risikogruppen soll nicht durchgeführt werden.                                                                                                      | A   | 3   | Leitlinien: [1]<br>Primärstudien: [10–13]  |

### 3.2 Diagnostik

| Nr.  | Statements                                                                                                                                                                                                                                                                                                                                                | EG  | LoE | Quellen |
|------|-----------------------------------------------------------------------------------------------------------------------------------------------------------------------------------------------------------------------------------------------------------------------------------------------------------------------------------------------------------|-----|-----|---------|
| 3.6. | Weitergehende Untersuchungen sollten eingeleitet werden, wenn folgende Symptome wiederholt und anhaltend insbesondere bei Frauen über 50 Lebensjahren auftreten:<br><ul style="list-style-type: none"> <li>▶ Völlegefühl</li> <li>▶ Blähungen</li> <li>▶ unklare abdominale Schmerzen oder Beschwerden</li> <li>▶ Zunahme der Miktionsfrequenz</li> </ul> | KKP |     |         |
| 3.7. | Bei dem Verdacht auf eine ovarielle Raumforderung soll eine gynäkologische Spiegel- und Tastuntersuchung und als erste apparative Maßnahme eine Transvaginalsonografie durchgeführt werden.                                                                                                                                                               | KKP |     |         |
| 3.8. | Es existiert keine apparative diagnostische Maßnahme, die ein operatives Staging beim Ovarialkarzinom ersetzen und die Operabilität verlässlich einschätzen kann.                                                                                                                                                                                         | KKP |     |         |

### 3.3 Rezidivdiagnostik

| Nr.   | Empfehlungen                                                                                                                                                                                                                                                                                                                                                      | EG | LoE | Quellen                |
|-------|-------------------------------------------------------------------------------------------------------------------------------------------------------------------------------------------------------------------------------------------------------------------------------------------------------------------------------------------------------------------|----|-----|------------------------|
| 3.9.  | asymptomatische Patientinnen:<br>Sollte entgegen der Leitlinien-Empfehlung ein Rezidivverdacht durch einen erhöhten CA125 Wert begründet sein, so sollte das weitere diagnostische Vorgehen individuell mit der Patientin diskutiert werden. Ein früherer präsymptomatischer Beginn einer Rezidivbehandlung ist nicht mit einem verbesserten Überleben verbunden. | B  | 1+  | Primärstudien: [14]    |
| 3.10. | symptomatische Patientinnen:<br>Bei Auftreten von Symptomen kann eine weiterführende apparative Diagnostik eingeleitet werden. Hinweise für eine Überlebensverlängerung konnten wir für keines der verfügbaren Verfahren identifizieren.                                                                                                                          | 0  | 2+  | Primärstudien: [15–23] |

#### 4 Patientinnenaufklärung und Information

| Nr.  | Statements                                                                                                                                                                                                                                                                                                                                                                                                                                                                                                                                                                                                                                                                                                                                    | EG  | LoE | Quellen |
|------|-----------------------------------------------------------------------------------------------------------------------------------------------------------------------------------------------------------------------------------------------------------------------------------------------------------------------------------------------------------------------------------------------------------------------------------------------------------------------------------------------------------------------------------------------------------------------------------------------------------------------------------------------------------------------------------------------------------------------------------------------|-----|-----|---------|
| 4.1. | Die ärztliche Aufklärung der Patientin soll Informationen über die Krankheit, erhobene Untersuchungsergebnisse, den bisherigen Behandlungsverlauf, Diagnose- und Therapieoptionen einschließlich der zu erwartenden Nebenwirkungen sowie die Einschätzungen über die damit verbundenen Prognosen und der Einfluss auf die Lebensplanung und -qualität der Patientin umfassen. Zur Unterstützung des Aufklärungsprozesses und der Entscheidungsfindung können schriftliche Materialien oder andere geeignete Medien eingesetzt werden.                                                                                                                                                                                                         | KKP |     |         |
| 4.2. | Die Vermittlung von Informationen und die Aufklärung der Patientin soll nach folgenden Grundprinzipien einer patientenzentrierten Kommunikation erfolgen: <ul style="list-style-type: none"> <li>▶ Ausdruck von Empathie und aktives Zuhören</li> <li>▶ direktes und einfühlsames Ansprechen schwieriger Themen</li> <li>▶ Vermeidung von medizinischem Fachvokabular, ggf. Erklärung von Fachbegriffen</li> <li>▶ Strategien, um das Verständnis zu verbessern (Wiederholung, Zusammenfassung wichtiger Informationen, Nutzung von Grafiken u. ä.)</li> <li>▶ Ermutigung, Fragen zu stellen</li> <li>▶ Erlaubnis und Ermutigung, Gefühle vor allem Befürchtungen und Ängste auszudrücken</li> <li>▶ weiterführende Hilfe anbieten</li> </ul> | KKP |     |         |
| 4.3. | Die Wünsche der Patientin hinsichtlich der Einbeziehung in die medizinische Entscheidungsfindung sollen berücksichtigt werden.                                                                                                                                                                                                                                                                                                                                                                                                                                                                                                                                                                                                                | KKP |     |         |

#### 5 Genetik, Prävention und Risikofaktoren

| Nr.  | Empfehlungen/Statements                                                                                                                                                                                                                                                           | EG | LoE | Quellen                                          |
|------|-----------------------------------------------------------------------------------------------------------------------------------------------------------------------------------------------------------------------------------------------------------------------------------|----|-----|--------------------------------------------------|
| 5.1. | Die bilaterale Salpingo-Oophorektomie ist die effektivste Methode zur Senkung des Erkrankungsrisikos und der Mortalität bei hereditärem Ovarialkarzinom.                                                                                                                          | ST | 2+  | Leitlinien: [1, 2]<br>Primärstudien: [11, 24–39] |
| 5.2. | Patientinnen mit nachgewiesener BRCA1/2-Mutation sollten nach abgeschlossener Familienplanung, jedoch nach dem 40. Lebensjahr oder 5 Jahre vor der jüngsten in der Familie an Ovarialkarzinom Erkrankten, die prophylaktische bilaterale Salpingo-Oophorektomie angeboten werden. | B  | 2+  | Leitlinien: [2]<br>Primärstudien: [11, 24–39]    |

#### 6 Pathologische Diagnostik und Prognosefaktoren

| Nr.  | Empfehlungen/Statements                                                                                                                                                                                                                                                                                                     | EG  | LoE | Quellen                |
|------|-----------------------------------------------------------------------------------------------------------------------------------------------------------------------------------------------------------------------------------------------------------------------------------------------------------------------------|-----|-----|------------------------|
| 6.1. | Für keinen der bisher untersuchten biochemischen Parameter lässt sich eine hinreichende Assoziation zwischen Nachweis und Prädiktion/Prognose darstellen.                                                                                                                                                                   | ST  | 2+  | Primärstudien: [40–50] |
| 6.2. | Als etablierte Prognosefaktoren des Ovarialkarzinoms sollen verwendet werden: <ul style="list-style-type: none"> <li>▶ Tumorstadium</li> <li>▶ postoperativer Tumorrest</li> <li>▶ Alter</li> <li>▶ Allgemeinzustand</li> <li>▶ histologischer Typ</li> <li>▶ Tumorgading</li> <li>▶ leitliniengerechte Therapie</li> </ul> | KKP |     |                        |

## 7 Operative Therapie

### 7.1 Operative Therapie des frühen Ovarialkarzinoms

| Nr.  | Empfehlungen                                                                                                                                                                                                                                                                                                                                                                                                                                                                                                                                                                                                      | EG  | LoE | Quellen                                   |
|------|-------------------------------------------------------------------------------------------------------------------------------------------------------------------------------------------------------------------------------------------------------------------------------------------------------------------------------------------------------------------------------------------------------------------------------------------------------------------------------------------------------------------------------------------------------------------------------------------------------------------|-----|-----|-------------------------------------------|
| 7.1. | Ein optimales Staging soll folgende Operationsschritte umfassen: <ul style="list-style-type: none"> <li>► Längsschnittlaparotomie</li> <li>► Inspektion und Palpation der gesamten Abdominalhöhle</li> <li>► Peritonealzytologie</li> <li>► Biopsien aus allen auffälligen Stellen</li> <li>► Peritonealbiopsien aus unauffälligen Regionen</li> <li>► Adnexektomie beidseits</li> <li>► Hysterektomie, ggf. extraperitoneales Vorgehen</li> <li>► Omentektomie mind. infrakolisch</li> <li>► Appendektomie (bei muzinösem/unklarem Tumortyp)</li> <li>► bds. pelvine und paraaortale Lymphonodektomie</li> </ul> | KKP |     |                                           |
| 7.2. | Im Falle einer unerwarteten Diagnose eines Ovarialkarzinoms soll eine histologische Sicherung und Beschreibung der Ausbreitung erfolgen. Die definitive Behandlung soll dann durch einen Gynäkoonkologen erfolgen.                                                                                                                                                                                                                                                                                                                                                                                                | KKP |     |                                           |
| 7.3. | Bei unilateralem Tumor im Stadium FIGO I kann unter der Voraussetzung eines adäquaten Stagings ein fertilitätsershaltendes operatives Vorgehen gewählt werden.                                                                                                                                                                                                                                                                                                                                                                                                                                                    | 0   | 4   | Primärstudien: [51–65]                    |
| 7.4. | Die Patientin mit einem frühen Ovarialkarzinom soll über ein in Abhängigkeit der Prognosefaktoren erhöhtes Risiko eines fertilitätsershaltenden Vorgehens aufgeklärt werden.                                                                                                                                                                                                                                                                                                                                                                                                                                      | KKP |     |                                           |
| 7.5. | Außerhalb von Studien soll ein laparoskopisches Staging nicht durchgeführt werden.                                                                                                                                                                                                                                                                                                                                                                                                                                                                                                                                | A   | 3   | Leitlinien: [2]<br>Primärstudien: [66–72] |

### 7.2 Operative Therapie des fortgeschrittenen Ovarialkarzinoms

| Nr.   | Empfehlungen/Statements                                                                                                                                                                                                                                              | EG  | LoE | Quellen                                   |
|-------|----------------------------------------------------------------------------------------------------------------------------------------------------------------------------------------------------------------------------------------------------------------------|-----|-----|-------------------------------------------|
| 7.6.  | Das Ziel der Primär-OP bei einem fortgeschrittenen Ovarialkarzinom soll eine makroskopisch vollständige Resektion sein.                                                                                                                                              | KKP |     |                                           |
| 7.7.  | Multiviszerele Resektionen sollen dann zum Einsatz kommen, wenn dadurch eine Komplettresektion (makroskopisch tumorfrei) erreicht werden kann oder eine Obstruktion damit beseitigt werden kann und seitens der Patientin keine Kontraindikationen bestehen.         | KKP |     |                                           |
| 7.8.  | Im Falle einer unerwarteten Diagnose eines fortgeschrittenen Ovarialkarzinoms soll eine histologische Sicherung und Beschreibung der Ausbreitung erfolgen. Die definitive Behandlung soll dann durch einen Gynäkoonkologen in einer geeigneten Einrichtung erfolgen. | A   | 4   | Leitlinien: [2]<br>Primärstudien: [73–89] |
| 7.9.  | Es gibt keinen Vorteil für eine primäre Chemotherapie gefolgt von einer Intervalloperation.                                                                                                                                                                          | ST  | 1+  | Leitlinien: [1]<br>Primärstudien: [90–95] |
| 7.10. | Als Therapiefolge soll die Primäroperation gefolgt von einer Chemotherapie durchgeführt werden.                                                                                                                                                                      | A   | 1+  | Leitlinien: [1]<br>Primärstudien: [90–95] |
| 7.11. | Eine Second-Look-Operation soll nicht durchgeführt werden.                                                                                                                                                                                                           | KKP |     |                                           |

## 8 Systemische Primärtherapie

### 8.1 Systemische Primärtherapie frühes Ovarialkarzinom

| Nr.  | Empfehlungen                                                                                                                                         | EG | LoE | Quellen                                                |
|------|------------------------------------------------------------------------------------------------------------------------------------------------------|----|-----|--------------------------------------------------------|
| 8.1. | Bei Patientinnen mit Ovarialkarzinom im Stadium IA Grad 1 nach komplettem operativem Staging soll keine adjuvante Chemotherapie durchgeführt werden. | A  | 1+  | Primärstudien: [96–104]                                |
| 8.2. | Patientinnen mit Ovarialkarzinom im Stadium IC oder IA/B und Grad 3 sollen eine platinhaltige Chemotherapie über 6 Zyklen erhalten.                  | A  | 1+  | Primärstudien: [96–104]                                |
| 8.3. | Bei Patientinnen mit Ovarialkarzinom im Stadium IAG2, IB G1/2 kann eine platinhaltige Chemotherapie angeboten werden.                                | 0  | 1+  | Primärstudien: [96–104]                                |
| 8.4. | Die Therapie sollte Carboplatin enthalten und über 6 Zyklen andauern.                                                                                | B  | 1+  | Leitlinien: [1, 2]<br>Primärstudien: [67, 99, 105–117] |

## 8.2 Systemische Primärtherapie des fortgeschrittenen Ovarialkarzinoms

| Nr.  | Empfehlungen                                                                                                                                                                                                               | EG  | LoE | Quellen                                            |
|------|----------------------------------------------------------------------------------------------------------------------------------------------------------------------------------------------------------------------------|-----|-----|----------------------------------------------------|
| 8.5. | Die First-Line-Chemotherapie für Patientinnen mit fortgeschrittenem Ovarialkarzinom (II b-IV) soll aus Carboplatin AUC5 und Paclitaxel 175 mg/m <sup>2</sup> über 3 h i. v. für insgesamt 6 Zyklen alle 3 Wochen bestehen. | A   | 1++ | Leitlinien: [118, 119]<br>Primärstudien: [120–131] |
| 8.6. | Beim fortgeschrittenen Ovarialkarzinom (IIIB-IV) kann eine zusätzliche Behandlung mit Bevacizumab erwogen werden.                                                                                                          | 0   | 1+  | Primärstudien: [132, 133]                          |
| 8.7. | Veränderungen von Dosisdichte oder Intensität sollten nur innerhalb von klinischen Studien zur Anwendung kommen.                                                                                                           | B   | 1+  | Leitlinien: [2]<br>Primärstudien: [134–146]        |
| 8.8. | Erhaltungs-/Konsolidierungstherapien nach Abschluss der Primärtherapie sollen nicht durchgeführt werden*                                                                                                                   | A   | 1+  | Primärstudien: [132, 133, 147–154]                 |
| 8.9. | Zur Identifikation von Schwierigkeiten in der Behandlung kann die systematische Erfassung der Lebensqualität der Patientin hilfreich sein.                                                                                 | KKP |     |                                                    |

\* Für die Wirksamkeit einer Konsolidierungs- oder Erhaltungstherapie im Hinblick auf PFS liegen nur Daten für Bevacizumab vor (siehe 8.6.)

## 9 Rezidivtherapie

### 9.1 Rezidivpopulationen

| Nr.  | Statement                                                                                                                                                                                                                                                                                                                                                                                                                                                                                                                                                                                                                                                                                                                                                                                                                                                                                                                  | EG | LoE | Quellen                                              |
|------|----------------------------------------------------------------------------------------------------------------------------------------------------------------------------------------------------------------------------------------------------------------------------------------------------------------------------------------------------------------------------------------------------------------------------------------------------------------------------------------------------------------------------------------------------------------------------------------------------------------------------------------------------------------------------------------------------------------------------------------------------------------------------------------------------------------------------------------------------------------------------------------------------------------------------|----|-----|------------------------------------------------------|
| 9.1. | <b>Platinsensitives Ovarialkarzinom:</b> Erkrankung spricht primär auf eine platinhaltige First-Line-Chemotherapie an und zeigt ein Rezidiv frühestens 6 Monate nach Abschluss der platinhaltigen Chemotherapie. Darin enthalten ist die Subgruppe der <b>partiell platinsensitiven Ovarialkarzinomrezidive</b> . Hier spricht die Erkrankung auch primär auf eine platinhaltige First-Line-Chemotherapie an, zeigt aber ein Rezidiv zwischen 6 und 12 Monate nach Abschluss der platinhaltigen Chemotherapie.<br><b>Platinresistentes Ovarialkarzinom:</b> Erkrankung zeigt ein Rezidiv innerhalb der ersten 6 Monate nach Abschluss der initialen platinhaltigen Chemotherapie. Darin enthalten ist die Subgruppe mit <b>platinrefraktärem Ovarialkarzinomrezidiv</b> . Hierbei spricht die Erkrankung nicht auf eine platinhaltige Chemotherapie an oder ist innerhalb von 4 Wochen nach Ende der Therapie progredient. | ST | 1+  | Leitlinien: [1, 119]<br>Primärstudien: [14, 155–163] |

### 9.2 Systemische Rezidivtherapie

#### 9.2.1 Platinresistentes Rezidiv

| Nr.  | Empfehlungen/Statements                                                                                                                                                                                                                                                                                                                              | EG | LoE | Quellen                                                      |
|------|------------------------------------------------------------------------------------------------------------------------------------------------------------------------------------------------------------------------------------------------------------------------------------------------------------------------------------------------------|----|-----|--------------------------------------------------------------|
| 9.2. | Eine Kombinationstherapie bietet keinen Vorteil gegenüber einer Monotherapie.                                                                                                                                                                                                                                                                        | ST | 1+  | Leitlinien: [119]<br>Primärstudien: [155, 156, 158, 164–171] |
| 9.3. | Endokrine Therapien sind einer Monochemotherapie unterlegen.                                                                                                                                                                                                                                                                                         | ST | 1+  | Leitlinien: [119]<br>Primärstudien: [155, 156, 158, 164–171] |
| 9.4. | Patientinnen mit platinresistentem und/oder -refraktärem Ovarialkarzinomrezidiv sollen, wenn eine Indikation zur Chemotherapie besteht, eine nicht platinhaltige Monotherapie erhalten. Folgende Zytostatika können in Betracht gezogen werden:<br>► pegyliertes liposomales Doxorubicin<br>► Topotecan<br>► Gemcitabine<br>► Paclitaxel wöchentlich | A  | 1+  | Leitlinien: [119]<br>Primärstudien: [155, 156, 158, 164–171] |

#### 9.2.2 Platinsensitives Rezidiv

| Nr.  | Empfehlungen                                                                                                                                                                                                                                                                                                                                                                       | EG  | LoE | Quellen |
|------|------------------------------------------------------------------------------------------------------------------------------------------------------------------------------------------------------------------------------------------------------------------------------------------------------------------------------------------------------------------------------------|-----|-----|---------|
| 9.5. | Patientinnen mit platinsensitivem Ovarialkarzinomrezidiv sollen, wenn eine Indikation zur Chemotherapie besteht, eine platinhaltige Kombinationstherapie erhalten. Folgende Kombinationen können in Betracht gezogen werden:<br>► Carboplatin/Gemcitabin/Bevacizumab*<br>► Carboplatin/pegyliertes liposomales Doxorubicin<br>► Carboplatin/Paclitaxel<br>► Carboplatin/Gemcitabin | KKP |     |         |

### 9.3 Operative Rezidivtherapie

| Nr.  | Empfehlungen                                                                                                                                                                                                   | EG | LoE | Quellen                                     |
|------|----------------------------------------------------------------------------------------------------------------------------------------------------------------------------------------------------------------|----|-----|---------------------------------------------|
| 9.6. | Der Stellenwert der Rezidivchirurgie beim Ovarialkarzinom lässt sich nicht durch prospektive Studiendaten mit hohem Evidenzniveau belegen, retrospektive Daten sprechen für einen möglichen klinischen Nutzen. | A  | 2+  | Leitlinien: [1]<br>Primärstudien: [172–177] |
| 9.7. | Ziel der Rezidiv-Operation sollte die makroskopische Komplettresektion sein.                                                                                                                                   | B  | 2+  | Leitlinien: [1]<br>Primärstudien: [172–177] |

## 10 Nachsorge, Rehabilitation, Psychoonkologie, Palliativmedizin

### 10.1 Nachsorge und Rehabilitation

| Nr.   | Empfehlungen/Statements                                                                                                                                                                                                                               | EG  | LoE | Quellen                                          |
|-------|-------------------------------------------------------------------------------------------------------------------------------------------------------------------------------------------------------------------------------------------------------|-----|-----|--------------------------------------------------|
| 10.1. | Patientinnen mit Ovarialkarzinom sollen über die Möglichkeiten rehabilitativer Maßnahmen sowie die Unterstützung durch die Sozialberatung informiert und nach individueller Abklärung des Bedarfs geeignete Maßnahmen angeboten werden.               | KKP |     |                                                  |
| 10.2. | Ziele der Nachsorge sind die Erkennung und Behandlung therapieassoziiierter Nebenwirkungen, das Angebot rehabilitativer Maßnahmen, die psychosoziale Betreuung und Reintegration, die Verbesserung der Lebensqualität und die Erkennung des Rezidivs. | KKP |     |                                                  |
| 10.3. | Der routinemäßige Einsatz einer CA-125-Bestimmung führt nicht zu einer Verlängerung des Überlebens.                                                                                                                                                   | ST  | 1+  | Leitlinien: [1]<br>Primärstudien: [14, 178, 179] |
| 10.4. | Eine routinemäßige apparative Diagnostik oder Marker Bestimmung soll in der Nachsorge bei symptomfreier Patientin nicht durchgeführt werden.                                                                                                          | A   | 1+  | Leitlinien: [1]<br>Primärstudien: [14, 178, 179] |
| 10.5. | Die Nachsorge soll eine sorgfältige Anamneseerhebung, die körperliche Untersuchung inklusive gynäkologischer Spiegel- und Tastuntersuchung, die rektale Untersuchung und die Vaginalsonografie umfassen.                                              | KKP |     |                                                  |
| 10.6. | Zur Sicherheit einer Hormontherapie nach Behandlung eines Ovarialkarzinoms kann keine zuverlässige Aussage gemacht werden.                                                                                                                            | ST  | 2+  | Primärstudien: [180–183]                         |
| 10.7. | Eine Hormontherapie kann nach behandeltem Ovarialkarzinom nicht empfohlen werden. Im Einzelfall kann sie erwogen werden, insbesondere bei erheblichen Einschränkungen der Lebensqualität.                                                             | 0   | 2+  | Primärstudien: [180–183]                         |

### 10.2 Psychoonkologie

| Nr.    | Empfehlungen                                                                                                                                                                                              | EG  | LoE | Quellen |
|--------|-----------------------------------------------------------------------------------------------------------------------------------------------------------------------------------------------------------|-----|-----|---------|
| 10.8.  | Psychosoziale Interventionen haben einen positiven Einfluss auf die Lebensqualität, die psychische Befindlichkeit und die Verarbeitung der Krankheit.                                                     | KKP |     |         |
| 10.9.  | Die psychoonkologische Versorgung von Patientinnen mit Ovarialkarzinom ist ein integraler Bestandteil der onkologischen Diagnostik, Therapie und Nachsorge und stellt eine interdisziplinäre Aufgabe dar. | KKP |     |         |
| 10.10. | Eine psychoonkologische Beratung und Unterstützung sollte allen Patientinnen und Angehörigen bedarfsgerecht angeboten werden.                                                                             | KKP |     |         |
| 10.11. | Das Thema Sexualität sollte immer aktiv exploriert werden, um weiteren Unterstützungsbedarf und entsprechende Hilfestellungen einleiten zu können.                                                        | KKP |     |         |

### 10.3 Palliativmedizin

| Nr.    | Empfehlungen                                                                                                                                                                                                         | EG  | LoE | Quellen |
|--------|----------------------------------------------------------------------------------------------------------------------------------------------------------------------------------------------------------------------|-----|-----|---------|
| 10.12. | Der richtige Zeitpunkt zum Einsatz palliativmedizinischer Maßnahmen hängt in erster Linie vom Bedürfnis der Patientin und dem individuellen krankheitsabhängigen Bedarf ab.                                          | KKP |     |         |
| 10.13. | Patientinnen, die in erster Linie einen palliativmedizinischen Betreuungsbedarf haben, sollten einem Programm der spezialisierten Palliativversorgung zugeführt werden.                                              | KKP |     |         |
| 10.14. | Palliativmedizinische Versorgung umfasst medizinische Symptomkontrolle, Palliativpflege und psychosoziale Begleitung bis zum Tod. Sie erfolgt bedarfsgerecht als allgemeine oder spezialisierte Palliativversorgung. | KKP |     |         |
| 10.15. | In der Palliativsituation sollten alle erforderlichen Maßnahmen an den individuellen Therapie- und Lebenszielen der Patientin orientiert werden.                                                                     | KKP |     |         |

## 11 Borderlinetumoren (BOT)

| Nr.   | Empfehlungen/Statements                                                                                                                                                                                                                                                                                                                                                                                                                                                                                                                                 | EG  | LoE | Quellen                                 |
|-------|---------------------------------------------------------------------------------------------------------------------------------------------------------------------------------------------------------------------------------------------------------------------------------------------------------------------------------------------------------------------------------------------------------------------------------------------------------------------------------------------------------------------------------------------------------|-----|-----|-----------------------------------------|
| 11.1. | Borderlinetumoren sollen nach WHO charakterisiert und subtypisiert werden. Dies soll die Charakterisierung eventuell vorhandener Implantate (invasiv – nicht invasiv), sowie Angaben zur Mikroinvasion mit einschließen.                                                                                                                                                                                                                                                                                                                                | KKP |     | [184]                                   |
| 11.2. | Ein sorgfältiges chirurgisches Staging ist erforderlich und sollte neben der kompletten Tumorentfernung (einschließlich bilateraler Salpingo-Oophorektomie) die Inspektion des Abdomens mit Gewinnung einer Spülzytologie, Resektion aller auffälligen Areale und peritonealer Biopsien unauffälliger Areale, sowie eine Omentektomie umfassen. Bei muzinösen Borderlinetumoren sollte die Metastasierung eines extraovariellen Tumors ausgeschlossen werden, dazu ist zum Ausschluss einer primären Appendixneoplasie eine Appendektomie erforderlich. | B   | 2+  | Primärstudien: [185–189]                |
| 11.3. | Es gibt Hinweise, dass Zystektomie anstatt Ovariectomie, sowie fertilitätserhaltendes Vorgehen anstatt bilaterale Salpingo-Oophorektomie mit höheren Rezidivraten assoziiert sind.                                                                                                                                                                                                                                                                                                                                                                      | ST  | 2+  | Primärstudien: [190]                    |
| 11.4. | Im Falle noch bestehenden Kinderwunsches/Wunsch nach Erhalt der endokrinen Funktion kann ein fertilitätserhaltendes Vorgehen gewählt werden. Über das erhöhte Rezidivrisiko soll aufgeklärt werden.                                                                                                                                                                                                                                                                                                                                                     | 0   | 2+  | Leitlinien: [2]<br>Primärstudien: [191] |
| 11.5. | Es gibt keine überzeugende Evidenz für die Wirksamkeit einer adjuvanten Therapie bei Borderlinetumoren.                                                                                                                                                                                                                                                                                                                                                                                                                                                 | ST  | 1+  | Leitlinien: [2]<br>Primärstudien: [192] |
| 11.6. | Patientinnen mit Borderlinetumoren sollen keine adjuvante Therapie erhalten.                                                                                                                                                                                                                                                                                                                                                                                                                                                                            | A   | 1+  | Leitlinien: [2]<br>Primärstudien: [192] |

## 12 Keimstrangstromatumoren des Ovars

| Nr.   | Empfehlungen/Statements                                                                                                                                                                                                                                                                                                                                                                                                                                                                                                                                                                                                                                                                                                                                                                                                     | EG  | LoE | Quellen                   |
|-------|-----------------------------------------------------------------------------------------------------------------------------------------------------------------------------------------------------------------------------------------------------------------------------------------------------------------------------------------------------------------------------------------------------------------------------------------------------------------------------------------------------------------------------------------------------------------------------------------------------------------------------------------------------------------------------------------------------------------------------------------------------------------------------------------------------------------------------|-----|-----|---------------------------|
| 12.1. | Die Diagnostik von Keimstrangstromatumoren soll in Anlehnung an das Ovarialkarzinom erfolgen.                                                                                                                                                                                                                                                                                                                                                                                                                                                                                                                                                                                                                                                                                                                               | KKP |     |                           |
| 12.2. | Ein optimales Staging soll folgende Operationsschritte umfassen:<br><ul style="list-style-type: none"> <li>▶ untere mediane Laparotomie</li> <li>▶ Inspektion und Palpation der gesamten Abdominalhöhle</li> <li>▶ Peritonealzytologie</li> <li>▶ Entfernung des Tumors durch Salpingo-Oophorektomie</li> <li>▶ bei Tumoren mit malignem Potenzial (Granulosazelltumor, Sertoli-Leydig-Zell-Tumor G2/G3 oder Steroidzelltumor NOS): <ul style="list-style-type: none"> <li>▶ Definitives operatives Staging analog Ovarialkarzinom.</li> <li>▶ Der Nutzen der systematischen Lymphonodektomie bei unauffälligen Lymphknoten ist nicht belegt.</li> <li>▶ Bei Belassen des Uterus Hysteroskopie und Abrasio empfohlen (zum Ausschluss einer Endometrium-hyperplasie oder eines Endometriumkarzinoms).</li> </ul> </li> </ul> | A   | 2+  | Primärstudien: [193–196]  |
| 12.3. | Ein fertilitätserhaltendes Vorgehen sollte bei jungen Patientinnen erwogen werden.                                                                                                                                                                                                                                                                                                                                                                                                                                                                                                                                                                                                                                                                                                                                          | B   | 2+  | Primärstudien: [53]       |
| 12.4. | Der Nutzen einer adjuvanten Strahlen-, Chemo- oder endokrinen Therapie bei kompletter Operation ist nicht belegt und wird kontrovers diskutiert.                                                                                                                                                                                                                                                                                                                                                                                                                                                                                                                                                                                                                                                                            | ST  | 2+  | Primärstudien: [197, 198] |
| 12.5. | Ab dem Stadium IC oder verbliebener Tumorreste sollte eine platinhaltige Chemotherapie erwogen werden.                                                                                                                                                                                                                                                                                                                                                                                                                                                                                                                                                                                                                                                                                                                      | B   | 2+  | Primärstudien: [199–202]  |

## 13 Keimzelltumoren des Ovars

| Nr.   | Empfehlungen/Statements                                                                                                                                                                                                                                                                                     | EG  | LoE | Quellen                      |
|-------|-------------------------------------------------------------------------------------------------------------------------------------------------------------------------------------------------------------------------------------------------------------------------------------------------------------|-----|-----|------------------------------|
| 13.1. | Die Diagnostik von Keimzelltumoren soll in Anlehnung an das Ovarialkarzinom erfolgen.                                                                                                                                                                                                                       | KKP |     |                              |
| 13.2. | Ziel der chirurgischen Therapie ist neben der histologischen Typisierung die komplette Tumorsektion und die adäquate Stadieneinteilung unter Erhalt der Fertilität bei unauffälligem verbleibendem Genitale. Der Nutzen der systematischen Lymphonodektomie bei unauffälligen Lymphknoten ist nicht belegt. | ST  | 2+  | Primärstudien: [53, 203–212] |
| 13.3. | Im Stadium IA soll keine adjuvante Chemotherapie erfolgen.                                                                                                                                                                                                                                                  | A   | 2+  | Primärstudien: [213]         |
| 13.4. | Ab dem Stadium > FIGO IA soll eine platinhaltige Chemotherapie durchgeführt werden, die risikoadaptiert aus 2 bzw. 3 Zytostatika* besteht und 2–4 Kurse umfasst.                                                                                                                                            | A   | 2+  | Primärstudien: [213, 214]    |
| 13.5. | Bei fortgeschrittenen Tumoren ist eine primäre Chemotherapie geeignet, die Fertilität zu erhalten. Die Resektion des Tumorrestes und residueller Metastasen ist nach Abschluss von 3 bzw. 4 Zyklen der Chemotherapie zu planen.                                                                             | KKP |     |                              |
| 13.6. | Die Nachsorge soll neben den allgemeinen Nachsorgeuntersuchungen die zusätzliche Bestimmung spezifischer Tumormarker umfassen.                                                                                                                                                                              | KKP |     |                              |

\* Die Chemotherapie soll in jedem Fall Platin und Etoposid enthalten. Als 3. Substanz kommen Bleomycin oder Ifosfamid infrage.

## 14 Versorgungsstrukturen

| Nr.   | Empfehlungen/Statements                                                                                                                                                                                                                                    | EG  | LoE | Quellen |
|-------|------------------------------------------------------------------------------------------------------------------------------------------------------------------------------------------------------------------------------------------------------------|-----|-----|---------|
| 14.1. | Die Behandlung einer Patientin mit Ovarialkarzinom sollte durch einen Gynäkoonkologen (Schwerpunktinhaber), in einer hierauf spezialisierten Einrichtung, in der interdisziplinäre diagnostische und therapeutische Möglichkeiten vorhanden sind, erfolgen | KKP |     |         |

## 15 Qualitätsindikatoren

| Qualitätsindikator                                                                                                                                                                                                                                                                                                                                                                                                            | Referenz Empfehlung                                                                                                                                                                                                                                                                                                                                                                                                                                                                                                                                                                                                          | Evidenzgrundlage/weitere Informationen                                                                                                                                                                                  |
|-------------------------------------------------------------------------------------------------------------------------------------------------------------------------------------------------------------------------------------------------------------------------------------------------------------------------------------------------------------------------------------------------------------------------------|------------------------------------------------------------------------------------------------------------------------------------------------------------------------------------------------------------------------------------------------------------------------------------------------------------------------------------------------------------------------------------------------------------------------------------------------------------------------------------------------------------------------------------------------------------------------------------------------------------------------------|-------------------------------------------------------------------------------------------------------------------------------------------------------------------------------------------------------------------------|
| <b>Qualitätsindikator 1: operatives Staging frühes Ovarialkarzinom</b>                                                                                                                                                                                                                                                                                                                                                        |                                                                                                                                                                                                                                                                                                                                                                                                                                                                                                                                                                                                                              |                                                                                                                                                                                                                         |
| Z: Anzahl Pat. mit operativem Staging mit:<br><ul style="list-style-type: none"> <li>▶ Laparotomie</li> <li>▶ Peritonealzytologie</li> <li>▶ Peritonealbiopsien</li> <li>▶ Adnexektomie beidseits</li> <li>▶ Hysterektomie, ggf. extraperitoneales Vorgehen</li> <li>▶ Omentektomie mind. infrakolisch</li> <li>▶ bds. pelvine und paraaortale Lymphonodektomie</li> </ul> N: alle Pat. mit Erstdiagnose Ov.-Ca FIGO I – IIIA | 7.1.<br>Ein optimales Staging soll folgende Operationsschritte umfassen:<br><ul style="list-style-type: none"> <li>▶ Längsschnittlaparotomie</li> <li>▶ Inspektion und Palpation der gesamten Abdominalhöhle</li> <li>▶ Peritonealzytologie</li> <li>▶ Biopsien aus allen auffälligen Stellen</li> <li>▶ Peritonealbiopsien aus unauffälligen Regionen</li> <li>▶ Adnexektomie beidseits</li> <li>▶ Hysterektomie, ggf. extraperitoneales Vorgehen</li> <li>▶ Omentektomie mind. infrakolisch</li> <li>▶ Appendektomie (bei muzinösem/unklarem Tumortyp)</li> <li>▶ bds. pelvine und paraaortale Lymphonodektomie</li> </ul> | a) <i>Qualitätsziel</i><br>möglichst häufig operatives Staging<br>b) <i>Evidenzgrundlage</i><br>KKP<br>Leitlinien: NICE 2011 [118]<br>Primärstudien: [215–223]                                                          |
| <b>Qualitätsindikator 2: intraoperative Tumorrupturn</b>                                                                                                                                                                                                                                                                                                                                                                      |                                                                                                                                                                                                                                                                                                                                                                                                                                                                                                                                                                                                                              |                                                                                                                                                                                                                         |
| Z: Anzahl Pat. mit intraoperativer Tumorrupturn<br>N: alle Pat. mit Erstdiagnose eines Ov.-Ca FIGO IA oder IB                                                                                                                                                                                                                                                                                                                 | Hintergrundtext zu 7.5.<br>„Bei laparoskopischer Entfernung eines unklaren Ovarialtumors ist die komplette Entfernung unter Vermeidung einer Ruptur notwendig“                                                                                                                                                                                                                                                                                                                                                                                                                                                               | a) <i>Qualitätsziel</i><br>keine intraoperative Tumorrupturn<br>b) <i>Evidenzgrundlage</i><br>Leitlinien: [1,2]<br>Primärstudien: [139–143]                                                                             |
| <b>Qualitätsindikator 3: makroskopisch vollständige Resektion fortgeschrittenes Ovarialkarzinom</b>                                                                                                                                                                                                                                                                                                                           |                                                                                                                                                                                                                                                                                                                                                                                                                                                                                                                                                                                                                              |                                                                                                                                                                                                                         |
| Z: Anzahl Pat. mit makroskopisch vollständiger Resektion<br>N: alle Pat. mit Erstdiagnose Ov.-Ca ≥ FIGO IIB und operativer Tumorentfernung                                                                                                                                                                                                                                                                                    | 7.6.<br>Das Ziel der Primär-OP soll eine makroskopisch vollständige Resektion sein.                                                                                                                                                                                                                                                                                                                                                                                                                                                                                                                                          | a) <i>Qualitätsziel</i><br>möglichst häufig makroskopisch vollständige Resektion<br>b) <i>Evidenzgrundlage</i><br>KKP<br>Leitlinien: [1,2]<br>Primärstudien: [75, 83, 95, 174, 224–236]                                 |
| <b>Qualitätsindikator 4: Operation fortgeschrittenes Ovarialkarzinom</b>                                                                                                                                                                                                                                                                                                                                                      |                                                                                                                                                                                                                                                                                                                                                                                                                                                                                                                                                                                                                              |                                                                                                                                                                                                                         |
| Z: Anzahl Pat., deren definitive operative Therapie durch einen Gynäkoonkologen durchgeführt wurde<br>N: alle Pat. mit Erstdiagnose Ov.-Ca FIGO ≥ IIB nach Abschluss der operativen Therapie                                                                                                                                                                                                                                  | 7.8.<br>Im Falle einer unerwarteten Diagnose eines fortgeschrittenen Ovarialkarzinoms soll eine histologische Sicherung und Beschreibung der Ausbreitung erfolgen. Die definitive Behandlung soll dann durch einen Gynäkoonkologen in einer geeigneten Einrichtung erfolgen.                                                                                                                                                                                                                                                                                                                                                 | a) <i>Qualitätsziel</i><br>möglichst häufig operative Therapie durch Gynäkoonkologen<br>b) <i>Evidenzgrundlage</i><br>LoE 4, A<br>Leitlinien: [2]<br>Primärstudien: [73–89]                                             |
| <b>Anmerkung:</b> Gynäkoonkologe = Facharzt/Fachärztin für Frauenheilkunde und Geburtshilfe mit Schwerpunkt Gynäkologische Onkologie = Gynäkologischer Onkologe/Gynäkologische Onkologin                                                                                                                                                                                                                                      |                                                                                                                                                                                                                                                                                                                                                                                                                                                                                                                                                                                                                              |                                                                                                                                                                                                                         |
| <b>Qualitätsindikator 5: postoperative Chemotherapie fortgeschrittenes Ovarialkarzinom</b>                                                                                                                                                                                                                                                                                                                                    |                                                                                                                                                                                                                                                                                                                                                                                                                                                                                                                                                                                                                              |                                                                                                                                                                                                                         |
| Z: Anzahl Pat. mit postoperativer Chemotherapie<br>N: alle Pat. mit Erstdiagnose Ov.-Ca ≥ FIGO IIB und Chemotherapie                                                                                                                                                                                                                                                                                                          | 7.10.<br>Als Therapiefolge soll die Primäroperation gefolgt von einer Chemotherapie durchgeführt werden.                                                                                                                                                                                                                                                                                                                                                                                                                                                                                                                     | a) <i>Qualitätsziel</i><br>möglichst häufig postoperative Chemotherapie bei fortgeschrittenem Ovarialkarzinom und Chemotherapie<br>b) <i>Evidenzgrundlage</i><br>LoE 1+, A<br>Leitlinien: [1]<br>Primärstudien: [90–95] |
| <b>Qualitätsindikator 6: keine adjuvante Chemotherapie frühes Ovarialkarzinom</b>                                                                                                                                                                                                                                                                                                                                             |                                                                                                                                                                                                                                                                                                                                                                                                                                                                                                                                                                                                                              |                                                                                                                                                                                                                         |
| Z: Anzahl Pat. mit adjuvanter Chemotherapie<br>N: alle Pat. mit Erstdiagnose Ov.-Ca FIGO IA, G 1 und komplettem operativem Staging                                                                                                                                                                                                                                                                                            | 8.1.<br>Bei Patientinnen mit Ovarialkarzinom im Stadium IA Grad 1 nach komplettem operativem Staging soll keine adjuvante Chemotherapie durchgeführt werden.                                                                                                                                                                                                                                                                                                                                                                                                                                                                 | a) <i>Qualitätsziel</i><br>möglichst keine adjuvante Chemotherapie bei FIGO IA, G 1 und komplettem operativem Staging<br>b) <i>Evidenzgrundlage</i><br>LoE 1+, A<br>Primärstudien: [96–104]                             |
| <b>Anmerkung:</b> Aktualisierung der FIGO-Klassifikation beachten! (Stand: 12/2012)                                                                                                                                                                                                                                                                                                                                           |                                                                                                                                                                                                                                                                                                                                                                                                                                                                                                                                                                                                                              |                                                                                                                                                                                                                         |

| Qualitätsindikator                                                                                                                                                                                                                                                                                        | Referenz Empfehlung                                                                                                                                                                                                                                                                                                                                                                          | Evidenzgrundlage/weitere Informationen                                                                                                                                                                                                                                                                                                        |
|-----------------------------------------------------------------------------------------------------------------------------------------------------------------------------------------------------------------------------------------------------------------------------------------------------------|----------------------------------------------------------------------------------------------------------------------------------------------------------------------------------------------------------------------------------------------------------------------------------------------------------------------------------------------------------------------------------------------|-----------------------------------------------------------------------------------------------------------------------------------------------------------------------------------------------------------------------------------------------------------------------------------------------------------------------------------------------|
| <b>Qualitätsindikator 7: platinhaltige Chemotherapie frühes Ovarialkarzinom</b>                                                                                                                                                                                                                           |                                                                                                                                                                                                                                                                                                                                                                                              |                                                                                                                                                                                                                                                                                                                                               |
| Z: Anzahl Pat. mit einer platinhaltigen Chemotherapie<br>N: alle Pat. mit Erstdiagnose Ov.-Ca FIGO IC oder IA/B mit Grad 3                                                                                                                                                                                | 8.2.<br>Patientinnen mit Ovarialkarzinom im Stadium IC oder IA/B und Grad 3 sollen eine platinhaltige Chemotherapie über 6 Zyklen erhalten.                                                                                                                                                                                                                                                  | a) <i>Qualitätsziel</i><br>möglichst häufig platinhaltige Chemotherapie bei Erstdiagnose Ov.-Ca FIGO IC oder IA/B mit Grad 3<br>b) <i>Evidenzgrundlage</i><br>LoE 1+, A<br>Primärstudien: [96–104]                                                                                                                                            |
| <b>Qualitätsindikator 8: First-Line-Chemotherapie fortgeschrittenes Ovarialkarzinom</b>                                                                                                                                                                                                                   |                                                                                                                                                                                                                                                                                                                                                                                              |                                                                                                                                                                                                                                                                                                                                               |
| Z: Anzahl Pat. mit 6 Zyklen First-Line-Chemotherapie Carboplatin AUC5 und Paclitaxel 175 mg/m <sup>2</sup><br>N: alle Pat. mit Erstdiagnose Ov.-Ca ≥ FIGO IIB                                                                                                                                             | 8.5.<br>Die First-Line-Chemotherapie für Patientinnen mit fortgeschrittenem Ovarialkarzinom (II b-IV) soll aus Carboplatin AUC5 und Paclitaxel 175 mg/m <sup>2</sup> über 3 h i. v. für insgesamt 6 Zyklen alle 3 Wochen bestehen.                                                                                                                                                           | a) <i>Qualitätsziel</i><br>möglichst häufig 6 Zyklen First-Line-Chemotherapie Carboplatin AUC5 und Paclitaxel 175 mg/m <sup>2</sup> bei Erstdiagnose Ov.-Ca ≥ FIGO IIB<br>b) <i>Evidenzgrundlage</i><br>LoE 1++, A<br>Leitlinien: NICE 2011 [118], NHS TA91 [119]<br>Primärstudien: [120–131]                                                 |
| <b>Qualitätsindikator 9: Chemotherapie bei platinresistentem und/oder -refraktärem Erstrezidiv</b>                                                                                                                                                                                                        |                                                                                                                                                                                                                                                                                                                                                                                              |                                                                                                                                                                                                                                                                                                                                               |
| Z: Anzahl der Pat. mit nicht platinhaltiger Monotherapie mit pegyliertem liposomalen Doxorubicin, Topotecan, Gemcitabine oder Paclitaxel wöchentlich<br>N: alle Pat. mit platinresistentem und/oder -refraktärem Erstrezidiv eines Ov.-Ca's und Erstrezidivchemotherapie außerhalb von klinischen Studien | 9.4.<br>Patientinnen mit platinresistentem und/oder -refraktärem Ovarialkarzinomrezidiv sollen, wenn eine Indikation zur Chemotherapie besteht, eine nicht platinhaltige Monotherapie erhalten:<br>Folgende Zytostatika können in Betracht gezogen werden:<br>► pegyliertes liposomales Doxorubicin<br>► Topotecan<br>► Gemcitabine<br>► Paclitaxel wöchentlich                              | a) <i>Qualitätsziel</i><br>möglichst häufig nicht platinhaltige Monotherapie (s.li.) bei platinresistentem und/oder -refraktärem Erstrezidiv eines Ov.-Ca's und Erstrezidivchemotherapie außerhalb von klinischen Studien<br>b) <i>Evidenzgrundlage</i><br>LoE 1+, A<br>Leitlinien: NHS TA91 [119]<br>Primärstudien: [155, 156, 158, 164–171] |
| <b>Anmerkung:</b> platinresistentes Rezidiv: Rezidiv innerhalb von 6 Monaten nach Abschluss der Primärtherapie                                                                                                                                                                                            |                                                                                                                                                                                                                                                                                                                                                                                              |                                                                                                                                                                                                                                                                                                                                               |
| <b>Qualitätsindikator 10: Kombinationstherapie bei platinsensitiven Rezidiv</b>                                                                                                                                                                                                                           |                                                                                                                                                                                                                                                                                                                                                                                              |                                                                                                                                                                                                                                                                                                                                               |
| Z: Anzahl Pat. mit platinhaltiger Kombinationstherapie<br>N: alle Pat. mit platinsensitiven Rezidiv eines Ov.-Ca's und Rezidivchemotherapie, außerhalb von klinischen Studien                                                                                                                             | 9.5<br>Patientinnen mit platinsensitivem Ovarialkarzinomrezidiv sollen, wenn eine Indikation zur Chemotherapie besteht, eine platinhaltige Kombinationstherapie erhalten.<br>Folgende Kombinationen können in Betracht gezogen werden:<br>► Carboplatin/Gemcitabin/Bevacizumab*<br>► Carboplatin/pegyliertes liposomales Doxorubicin<br>► Carboplatin/Paclitaxel<br>► Carboplatin/Gemcitabin | a) <i>Qualitätsziel</i><br>möglichst häufig platinhaltige Kombinationstherapie bei platinsensitivem Rezidiv und Rezidivchemotherapie, außerhalb von klinischen Studien<br>b) <i>Evidenzgrundlage</i><br>KKP<br>Leitlinien: [1]<br>Primärstudien: [155, 157, 171, 237, 238]                                                                    |
| <b>Anmerkung:</b> platinhaltige Kombinationstherapie: Carboplatin/Gemcitabin/Bevacizumab*, Carboplatin/pegyliertes liposomales Doxorubicin, Carboplatin/Paclitaxel, Carboplatin/Gemcitabin                                                                                                                |                                                                                                                                                                                                                                                                                                                                                                                              |                                                                                                                                                                                                                                                                                                                                               |
| <b>Qualitätsindikator 11: Beratung Sozialdienst</b>                                                                                                                                                                                                                                                       |                                                                                                                                                                                                                                                                                                                                                                                              |                                                                                                                                                                                                                                                                                                                                               |
| Z: Anzahl Pat. mit Beratung durch den Sozialdienst<br>N: alle Pat. mit Erstdiagnose Ov.-Ca und Behandlung in der Einrichtung                                                                                                                                                                              | 10.1.<br>Patientinnen mit Ovarialkarzinom sollen über die Möglichkeiten rehabilitativer Maßnahmen sowie die Unterstützung durch die Sozialberatung informiert und nach individueller Abklärung des Bedarfs geeignete Maßnahmen angeboten werden.                                                                                                                                             | a) <i>Qualitätsziel</i><br>möglichst häufig Beratung durch den Sozialdienst bei Erstdiagnose Ovarialkarzinom<br>b) <i>Evidenzgrundlage</i><br>KKP<br>Leitlinien: [1]<br>Primärstudien: [14, 178, 179]                                                                                                                                         |
| <b>Qualitätsindikator 12: keine adjuvante Therapie BOT</b>                                                                                                                                                                                                                                                |                                                                                                                                                                                                                                                                                                                                                                                              |                                                                                                                                                                                                                                                                                                                                               |
| Z: Anzahl Pat. mit adjuvanter Therapie<br>N: alle Pat. mit Erstdiagnose eines BOT                                                                                                                                                                                                                         | 11.6.<br>Patientinnen mit Borderlinetumoren sollen keine adjuvante Therapie erhalten.                                                                                                                                                                                                                                                                                                        | a) <i>Qualitätsziel</i><br>keine adjuvante Therapie bei BOT<br>b) <i>Evidenzgrundlage</i><br>LoE 2+, A<br>Leitlinien: [2]<br>Primärstudien: [192]                                                                                                                                                                                             |

\* bei Patientinnen mit erstem Rezidiv und ohne vorherige VEGF-gerichtete Therapie

## 16 Literatur

- 1 Scottish Intercollegiate Guidelines Network. SIGN #75: Epithelial ovarian cancer. A national clinical guideline. Scottish Intercollegiate Guidelines Network; 2003
- 2 The Australian Cancer Network and National Breast Cancer Centre. Clinical practice guidelines for the management of women with epithelial ovarian cancer. Camperdown, NSW: National Breast Cancer Centre; 2004
- 3 Menon U *et al.* Sensitivity and specificity of multimodal and ultrasound screening for ovarian cancer, and stage distribution of detected cancers: results of the prevalence screen of the UK Collaborative Trial of Ovarian Cancer Screening (UKCTOCS). *Lancet Oncol* 2009; 10: 327–340
- 4 Kobayashi H *et al.* A randomized study of screening for ovarian cancer: a multicenter study in Japan. *Int J Gynecol Cancer* 2008; 18: 414–420
- 5 Buys SS *et al.* Effect of screening on ovarian cancer mortality: the Prostate, Lung, Colorectal and Ovarian (PLCO) Cancer Screening Randomized Controlled Trial. *JAMA* 2011; 305: 2295–2303
- 6 Fung MF *et al.* Screening postmenopausal women for ovarian cancer: a systematic review. *J Obstet Gynaecol Can* 2004; 26: 717–728
- 7 van Nagell Jr. JR *et al.* Long-term survival of women with epithelial ovarian cancer detected by ultrasonographic screening. *Obstet Gynecol* 2011; 118: 1212–1221
- 8 Timmerman D *et al.* Simple ultrasound-based rules for the diagnosis of ovarian cancer. *Ultrasound Obstet Gynecol* 2008; 31: 681–690
- 9 Timmerman D *et al.* Terms, definitions and measurements to describe the sonographic features of adnexal tumors: a consensus opinion from the International Ovarian Tumor Analysis (IOTA) Group. *Ultrasound Obstet Gynecol* 2000; 16: 500–505
- 10 Karlan BY *et al.* Peritoneal serous papillary carcinoma, a phenotypic variant of familial ovarian cancer: implications for ovarian cancer screening. *Am J Obstet Gynecol* 1999; 180: 917–928
- 11 Moller P *et al.* The BRCA1 syndrome and other inherited breast or breast-ovarian cancers in a Norwegian prospective series. *Eur J Cancer* 2001; 37: 1027–1032
- 12 Taylor L, Schwarz H. Identification of a soluble OX40 isoform: development of a specific and quantitative immunoassay. *J Immunol Methods* 2001; 255: 67–72
- 13 van der Velde NM *et al.* Time to stop ovarian cancer screening in BRCA1/2 mutation carriers? *Int J Cancer* 2009; 124: 919–923
- 14 Rustin GJ *et al.* Early versus delayed treatment of relapsed ovarian cancer (MRC OV05/EORTC55955): a randomised trial. *Lancet* 2010; 376: 1155–1163
- 15 Forstner R *et al.* ESUR guidelines: ovarian cancer staging and follow-up. *Eur Radiol* 2010; 20: 2773–2780
- 16 Peng NJ *et al.* Early detection of recurrent ovarian cancer in patients with low-level increases in serum CA-125 levels by 2-[F-18]fluoro-2-deoxy-D-glucose-positron emission tomography/computed tomography. *Cancer Biother Radiopharm* 2011; 26: 175–181
- 17 Gu P *et al.* CA 125, PET alone, PET-CT, CT and MRI in diagnosing recurrent ovarian carcinoma: a systematic review and meta-analysis. *Eur J Radiol* 2009; 71: 164–174
- 18 Partridge EE, Barnes MN. Epithelial ovarian cancer: prevention, diagnosis, and treatment. *CA Cancer J Clin* 1999; 49: 297–320
- 19 ESMO. ESMO minimum clinical recommendations for diagnosis, treatment and follow-up of ovarian cancer. *Ann Oncol* 2001; 12: 1205–1207
- 20 Jacobs I, Bast Jr. RC. The CA 125 tumour-associated antigen: a review of the literature. *Hum Reprod* 1989; 4: 1–12
- 21 IQWiG. Positronenemissionstomographie (PET) und PET/CT bei Ovarialkarzinom. 2011. [www.iqwig.de](http://www.iqwig.de)
- 22 Torizuka T *et al.* Ovarian cancer recurrence: role of whole-body positron emission tomography using 2-[fluorine-18]-fluoro-2-deoxy-D-glucose. *Eur J Nucl Med Mol Imaging* 2002; 29: 797–803
- 23 Takekuma M *et al.* Positron emission tomography with 18F-fluoro-2-deoxyglucose for the detection of recurrent ovarian cancer. *Int J Clin Oncol* 2005; 10: 177–181
- 24 Rebbeck TR *et al.* Prophylactic oophorectomy in carriers of BRCA1 or BRCA2 mutations. *N Engl J Med* 2002; 346: 1616–1622
- 25 Kauff ND *et al.* Risk-reducing salpingo-oophorectomy in women with a BRCA1 or BRCA2 mutation. *N Engl J Med* 2002; 346: 1609–1615
- 26 Haber D. Prophylactic oophorectomy to reduce the risk of ovarian and breast cancer in carriers of BRCA mutations. *N Engl J Med* 2002; 346: 1660–1662
- 27 Finch A *et al.* Salpingo-oophorectomy and the risk of ovarian, fallopian tube, and peritoneal cancers in women with a BRCA1 or BRCA2 Mutation. *JAMA* 2006; 296: 185–192
- 28 Rebbeck TR *et al.*; PROSE Study Group. Effect of short-term hormone replacement therapy on breast cancer risk reduction after bilateral prophylactic oophorectomy in BRCA1 and BRCA2 mutation carriers: the PROSE Study Group. *J Clin Oncol* 2005; 23: 7804–7810
- 29 Madalinska JB *et al.* The impact of hormone replacement therapy on menopausal symptoms in younger high-risk women after prophylactic salpingo-oophorectomy. *J Clin Oncol* 2006; 24: 3576–3582
- 30 Parker WH *et al.* Ovarian conservation at the time of hysterectomy and long-term health outcomes in the nurses' health study. *Obstet Gynecol* 2009; 113: 1027–1037
- 31 Madalinska JB *et al.* Quality-of-life effects of prophylactic salpingo-oophorectomy versus gynecologic screening among women at increased risk of hereditary ovarian cancer. *J Clin Oncol* 2005; 23: 6890–6898
- 32 Wagner TM *et al.* Attitude towards prophylactic surgery and effects of genetic counselling in families with BRCA mutations. Austrian Hereditary Breast and Ovarian Cancer Group. *Br J Cancer* 2000; 82: 1249–1253
- 33 Hallowell N. A qualitative study of the information needs of high-risk women undergoing prophylactic oophorectomy. *Psychooncology* 2000; 9: 486–495
- 34 Fry A *et al.* Prophylactic oophorectomy versus screening: psychosocial outcomes in women at increased risk of ovarian cancer. *Psychooncology* 2001; 10: 231–241
- 35 Antoniou A *et al.* Average risks of breast and ovarian cancer associated with BRCA1 or BRCA2 mutations detected in case Series unselected for family history: a combined analysis of 22 studies. *Am J Hum Genet* 2003; 72: 1117–1130
- 36 Bonadona V *et al.* Cancer risks associated with germline mutations in MLH1, MSH2, and MSH6 genes in Lynch syndrome. *JAMA* 2011; 305: 2304–2310
- 37 Chen S *et al.* Characterization of BRCA1 and BRCA2 mutations in a large United States sample. *J Clin Oncol* 2006; 24: 863–871
- 38 Dreyer G. Screening for gynaecologic cancers in genetically predisposed women. *Best Pract Res Clin Obstet Gynaecol* 2012; 26: 267–282
- 39 Tinelli A *et al.* Hereditary ovarian cancers: from BRCA mutations to clinical management. A modern appraisal. *Cancer Metastasis Rev* 2010; 29: 339–350
- 40 Malamou-Mitsi V *et al.* Prognostic significance of HER-2, p53 and Bcl-2 in patients with epithelial ovarian cancer. *Anticancer Res* 2007; 27: 1157–1165
- 41 Kommoss S *et al.* Independent prognostic significance of cell cycle regulator proteins p16(INK4a) and pRb in advanced-stage ovarian carcinoma including optimally debulked patients: a translational research subprotocol of a randomised study of the Arbeitsgemeinschaft Gynäkologische Onkologie Ovarian Cancer Study Group. *Br J Cancer* 2007; 96: 306–313
- 42 Secord AA *et al.* Co-expression of angiogenic markers and associations with prognosis in advanced epithelial ovarian cancer: a Gynecologic Oncology Group study. *Gynecol Oncol* 2007; 106: 221–232
- 43 Bellati F *et al.* Immunology of gynecologic neoplasms: analysis of the prognostic significance of the immune status. *Curr Cancer Drug Targets* 2009; 9: 541–565
- 44 Cree IA. Chemosensitivity and chemoresistance testing in ovarian cancer. *Curr Opin Obstet Gynecol* 2009; 21: 39–43
- 45 Harry VN, Gilbert FJ, Parkin DE. Predicting the response of advanced cervical and ovarian tumors to therapy. *Obstet Gynecol Surv* 2009; 64: 548–560
- 46 Itamochi H, Kigawa J, Terakawa N. Mechanisms of chemoresistance and poor prognosis in ovarian clear cell carcinoma. *Cancer Sci* 2008; 99: 653–658
- 47 Liu N, Wang X, Sheng X. 'Triple negative' epithelial ovarian cancer and pathologic markers for prognosis. *Curr Opin Obstet Gynecol* 2011; 23: 19–23
- 48 Sabatier R *et al.* Gene expression profiling and prediction of clinical outcome in ovarian cancer. *Crit Rev Oncol Hematol* 2009; 72: 98–109
- 49 Tian C *et al.* CA-125 change after chemotherapy in prediction of treatment outcome among advanced mucinous and clear cell epithelial ovarian cancers: a Gynecologic Oncology Group study. *Cancer* 2009; 115: 1395–1403
- 50 Trainer AH *et al.* Moving toward personalized medicine: treatment-focused genetic testing of women newly diagnosed with ovarian cancer. *Int J Gynecol Cancer* 2010; 20: 704–716

- 51 Shaw MC *et al.* Development of an evidence-based algorithm for the management of ovarian cancer. *Eur J Gynaecol Oncol* 2003; 24: 117–125
- 52 Ayhan A *et al.* Oncologic and reproductive outcome after fertility-sparing surgery in ovarian cancer. *Eur J Gynaecol Oncol* 2003; 24: 223–232
- 53 Gershenson DM. Fertility-sparing surgery for malignancies in women. *J Natl Cancer Inst Monogr* 2005; 34: 43–47
- 54 Morice P *et al.* Conservative treatment in epithelial ovarian cancer: results of a multicentre study of the GCCLCC (Groupe des Chirurgiens de Centre de Lutte Contre le Cancer) and SFOG (Société Française d'Onco-gynécologie). *Hum Reprod* 2005; 20: 1379–1385
- 55 Leitao Jr. MM, Chi DS. Fertility-sparing options for patients with gynecologic malignancies. *Oncologist* 2005; 10: 613–622
- 56 Dexeus S, Labastida R, Dexeus D. Conservative management of epithelial ovarian cancer. *Eur J Gynaecol Oncol* 2005; 26: 473–478
- 57 Monk BJ, Disaia PJ. What is the role of conservative primary surgical management of epithelial ovarian cancer: the United States experience and debate. *Int J Gynecol Cancer* 2005; 15 (Suppl. 3): 199–205
- 58 Colombo N *et al.* Role of conservative surgery in ovarian cancer: the European experience. *Int J Gynecol Cancer* 2005; 15 (Suppl. 3): 206–211
- 59 Marthom E, Cohen I. Fertility preservation options for women with malignancies. *Obstet Gynecol Surv* 2007; 62: 58–72
- 60 Denschlag D *et al.* Clinical recommendation on fertility preservation in borderline ovarian neoplasm: ovarian stimulation and oocyte retrieval after conservative surgery. *Gynecol Obstet Invest* 2010; 70: 160–165
- 61 Sarnacki S, Brisse H. Surgery of ovarian tumors in children. *Horm Res Paediatr* 2011; 75: 220–224
- 62 Zanetta G *et al.* Conservative surgery for stage I ovarian carcinoma in women of childbearing age. *Br J Obstet Gynaecol* 1997; 104: 1030–1035
- 63 Schilder JM *et al.* Outcome of reproductive age women with stage IA or IC invasive epithelial ovarian cancer treated with fertility-sparing therapy. *Gynecol Oncol* 2002; 87: 1–7
- 64 Morice P *et al.* Results of conservative management of epithelial malignant and borderline ovarian tumours. *Hum Reprod Update* 2003; 9: 185–192
- 65 Duska LR *et al.* Epithelial ovarian carcinoma in the reproductive age group. *Cancer* 1999; 85: 2623–2629
- 66 Medeiros LR *et al.* Laparoscopy versus laparotomy for FIGO Stage I ovarian cancer. *Cochrane Database Syst Rev* 2008; (4): CD005344
- 67 Trope C, Kaern J. Adjuvant chemotherapy for early-stage ovarian cancer: review of the literature. *J Clin Oncol* 2007; 25: 2909–2920
- 68 Panici PB *et al.* Laparoscopy compared with laparoscopically guided minilaparotomy for large adnexal masses: a randomized controlled trial. *Obstet Gynecol* 2007; 110 (2 Pt 1): 241–248
- 69 Ghezzi F *et al.* Should adnexal mass size influence surgical approach? A series of 186 laparoscopically managed large adnexal masses. *BJOG* 2008; 115: 1020–1027
- 70 Fagotti A *et al.* Should laparoscopy be included in the work-up of advanced ovarian cancer patients attempting interval debulking surgery? *Gynecol Oncol* 2010; 116: 72–77
- 71 Kindermann G, Maassen V, Kuhn W. Laparoscopic management of ovarian tumors subsequently diagnosed as malignant: a survey from 127 German departments of obstetrics and gynecology. *J Pelvic Surgery* 1996; 2: 245–251
- 72 Canis M *et al.* Laparoscopic management of adnexal masses: a gold standard? *Curr Opin Obstet Gynecol* 2002; 14: 423–428
- 73 Randall TC, Rubin SC. Surgical management of ovarian cancer. *Semin Surg Oncol* 1999; 17: 173–180
- 74 Axtell AE *et al.* Multi-institutional reciprocal validation study of computed tomography predictors of suboptimal primary cytoreduction in patients with advanced ovarian cancer. *J Clin Oncol* 2007; 25: 384–389
- 75 Wimberger P *et al.* Influence of residual tumor on outcome in ovarian cancer patients with FIGO stage IV disease: an exploratory analysis of the AGO-OVAR (Arbeitsgemeinschaft Gynaekologische Onkologie Ovarian Cancer Study Group). *Ann Surg Oncol* 2010; 17: 1642–1648
- 76 Gadducci A *et al.* Relationship between time interval from primary surgery to the start of taxane- plus platinum-based chemotherapy and clinical outcome of patients with advanced epithelial ovarian cancer: results of a multicenter retrospective Italian study. *J Clin Oncol* 2005; 23: 751–758
- 77 Trope C, Kaern J. Primary surgery for ovarian cancer. *Eur J Surg Oncol* 2006; 32: 844–852
- 78 Bristow RE *et al.* Delaying the primary surgical effort for advanced ovarian cancer: a systematic review of neoadjuvant chemotherapy and interval cytoreduction. *Gynecol Oncol* 2007; 104: 480–490
- 79 Wimberger P *et al.* Prognostic factors for complete debulking in advanced ovarian cancer and its impact on survival. An exploratory analysis of a prospectively randomized phase III study of the Arbeitsgemeinschaft Gynaekologische Onkologie Ovarian Cancer Study Group (AGO-OVAR). *Gynecol Oncol* 2007; 106: 69–74
- 80 Vernooij F *et al.* The outcomes of ovarian cancer treatment are better when provided by gynecologic oncologists and in specialized hospitals: a systematic review. *Gynecol Oncol* 2007; 105: 801–812
- 81 Elit LM *et al.* Surgical outcomes in women with ovarian cancer. *Can J Surg* 2008; 51: 346–354
- 82 Gerestein CG *et al.* The prediction of progression-free and overall survival in women with an advanced stage of epithelial ovarian carcinoma. *BJOG* 2009; 116: 372–380
- 83 du Bois A *et al.* Role of surgical outcome as prognostic factor in advanced epithelial ovarian cancer: a combined exploratory analysis of 3 prospectively randomized phase 3 multicenter trials: by the Arbeitsgemeinschaft Gynaekologische Onkologie Studiengruppe Ovarialkarzinom (AGO-OVAR) and the Groupe d'Investigateurs Nationaux Pour les Etudes des Cancers de l'Ovaire (GINECO). *Cancer* 2009; 115: 1234–1244
- 84 Gerestein CG *et al.* Causes of postoperative mortality after surgery for ovarian cancer. *Eur J Cancer* 2009; 45: 2799–2803
- 85 Einenkel J *et al.* Characteristics and management of diaphragm involvement in patients with primary advanced-stage ovarian, fallopian tube, or peritoneal cancer. *Int J Gynecol Cancer* 2009; 19: 1288–1297
- 86 Tixier H *et al.* Evaluation of pelvic posterior exenteration in the management of advanced-stage ovarian cancer. *Arch Gynecol Obstet* 2010; 281: 505–510
- 87 Gerestein CG *et al.* Prediction of residual disease after primary cytoreductive surgery for advanced-stage ovarian cancer: accuracy of clinical judgment. *Int J Gynecol Cancer* 2009; 19: 1511–1515
- 88 Aletti GD *et al.* Identification of patient groups at highest risk from traditional approach to ovarian cancer treatment. *Gynecol Oncol* 2011; 120: 23–28
- 89 du Bois A *et al.* Variations in institutional infrastructure, physician specialization and experience, and outcome in ovarian cancer: a systematic review. *Gynecol Oncol* 2009; 112: 422–436
- 90 Vergote I *et al.* Neoadjuvant chemotherapy or primary surgery in stage IIIC or IV ovarian cancer. *N Engl J Med* 2010; 363: 943–953
- 91 Schwartz PE *et al.* Neoadjuvant chemotherapy for advanced ovarian cancer: long-term survival. *Gynecol Oncol* 1999; 72: 93–99
- 92 van der Burg ME *et al.* The effect of debulking surgery after induction chemotherapy on the prognosis in advanced epithelial ovarian cancer. *Gynecological Cancer Cooperative Group of the European Organization for Research and Treatment of Cancer. N Engl J Med* 1995; 332: 629–634
- 93 Rose PG *et al.*; *Gynecologic Oncology Group*. Secondary surgical cytoreduction for advanced ovarian carcinoma. *N Engl J Med* 2004; 351: 2489–2497
- 94 Redman CW *et al.* Intervention debulking surgery in advanced epithelial ovarian cancer. *Br J Obstet Gynaecol* 1994; 101: 142–146
- 95 Tangjitgamol S *et al.* Interval debulking surgery for advanced epithelial ovarian cancer. *Cochrane Database Syst Rev* 2010; (10): CD006014
- 96 Winter-Roach BA, Kitchener HC, Dickinson HO. Adjuvant (post-surgery) chemotherapy for early stage epithelial ovarian cancer. *Cochrane Database Syst Rev* 2009; (3): CD004706
- 97 Young RC *et al.* Adjuvant therapy in stage I and stage II epithelial ovarian cancer. Results of two prospective randomized trials. *N Engl J Med* 1990; 322: 1021–1027
- 98 Trope C *et al.* Are borderline tumors of the ovary overtreated both surgically and systemically? A review of four prospective randomized trials including 253 patients with borderline tumors. *Gynecol Oncol* 1993; 51: 236–243
- 99 Trimbos JB *et al.* Impact of adjuvant chemotherapy and surgical staging in early-stage ovarian carcinoma: European Organisation for Research and Treatment of Cancer-Adjuvant Chemotherapy in Ovarian Neoplasm trial. *J Natl Cancer Inst* 2003; 95: 113–125

- 100 Timmers PJ *et al.* Clear cell carcinoma compared to serous carcinoma in early ovarian cancer: same prognosis in a large randomized trial. *Int J Gynecol Cancer* 2009; 19: 88–93
- 101 Trimbos B *et al.* Surgical staging and treatment of early ovarian cancer: long-term analysis from a randomized trial. *J Natl Cancer Inst* 2010; 102: 982–987
- 102 Adams G *et al.* Platinum-based adjuvant chemotherapy for early-stage epithelial ovarian cancer: single or combination chemotherapy? *BJOG* 2010; 117: 1459–1467
- 103 Takano M *et al.* Less impact of adjuvant chemotherapy for stage I clear cell carcinoma of the ovary: a retrospective Japan Clear Cell Carcinoma Study. *Int J Gynecol Cancer* 2010; 20: 1506–1510
- 104 Garcia-Saenz JA *et al.* Platinum-based adjuvant chemotherapy on moderate- and high-risk stage I and II epithelial ovarian cancer patients. Long-term single institution experience and literature review. *Clin Transl Oncol* 2011; 13: 121–132
- 105 Trimbos JB *et al.* International Collaborative Ovarian Neoplasm trial 1 and Adjuvant ChemoTherapy In Ovarian Neoplasm trial: two parallel randomized phase III trials of adjuvant chemotherapy in patients with early-stage ovarian carcinoma. *J Natl Cancer Inst* 2003; 95: 105–112
- 106 Colombo N *et al.* International Collaborative Ovarian Neoplasm trial 1: a randomized trial of adjuvant chemotherapy in women with early-stage ovarian cancer. *J Natl Cancer Inst* 2003; 95: 125–132
- 107 Vergote I *et al.* Prognostic importance of degree of differentiation and cyst rupture in stage I invasive epithelial ovarian carcinoma. *Lancet* 2001; 357: 176–182
- 108 Ho CM *et al.* Evaluation of complete surgical staging with pelvic and para-aortic lymphadenectomy and paclitaxel plus carboplatin chemotherapy for improvement of survival in stage I ovarian clear cell carcinoma. *Gynecol Oncol* 2003; 88: 394–399
- 109 Kitchener HC. Adjuvant chemotherapy improves survival after resection of stage I ovarian cancer. *Cancer Treat Rev* 2005; 31: 323–327
- 110 Shimada M *et al.* Outcome of patients with early ovarian cancer undergoing three courses of adjuvant chemotherapy following complete surgical staging. *Int J Gynecol Cancer* 2005; 15: 601–605
- 111 Bell J *et al.* Randomized phase III trial of three versus six cycles of adjuvant carboplatin and paclitaxel in early stage epithelial ovarian carcinoma: a Gynecologic Oncology Group study. *Gynecol Oncol* 2006; 102: 432–439
- 112 Obermair A *et al.* A new prognostic model for FIGO stage 1 epithelial ovarian cancer. *Gynecol Oncol* 2007; 104: 607–611
- 113 Skirnisdottir I, Sorbe B. Survival and prognostic factors in early-stage epithelial ovarian carcinoma treated with taxane-based adjuvant chemotherapy. *Int J Gynecol Cancer* 2007; 17: 1231–1237
- 114 Chan JK *et al.* Prognostic factors for high-risk early-stage epithelial ovarian cancer: a Gynecologic Oncology Group study. *Cancer* 2008; 112: 2202–2210
- 115 Takano M *et al.* Clear cell carcinoma of the ovary: a retrospective multicentre experience of 254 patients with complete surgical staging. *Br J Cancer* 2006; 94: 1369–1374
- 116 Chan JK *et al.* The potential benefit of 6 vs. 3 cycles of chemotherapy in subsets of women with early-stage high-risk epithelial ovarian cancer: an exploratory analysis of a Gynecologic Oncology Group study. *Gynecol Oncol* 2010; 116: 301–306
- 117 Mannel RS *et al.* A randomized phase III trial of IV carboplatin and paclitaxel × 3 courses followed by observation versus weekly maintenance low-dose paclitaxel in patients with early-stage ovarian carcinoma: a Gynecologic Oncology Group Study. *Gynecol Oncol* 2011; 122: 89–94
- 118 NICE. NICE clinical guideline 122. The recognition and initial management of ovarian cancer. 2011 [cited 2012 September 7]. <http://guidance.nice.org.uk/CG122>; Stand: 07.09.2012
- 119 NHS National Institute for Health and Clinical Excellence. Technology Appraisal Guidance 91 Paclitaxel, pegylated liposomal doxorubicin hydrochloride and topotecan for second-line or subsequent treatment of advanced ovarian cancer. 2005 [cited 2012 September 7]. <http://www.nice.org.uk/TA091>; Stand: 07.09.2012
- 120 ICON Collaborators. ICON2: randomised trial of single-agent carboplatin against three-drug combination of CAP (cyclophosphamide, doxorubicin, and cisplatin) in women with ovarian cancer. ICON Collaborators. International Collaborative Ovarian Neoplasm Study. *Lancet* 1998; 352: 1571–1576
- 121 ICON Collaborators. Paclitaxel plus carboplatin versus standard chemotherapy with either single-agent carboplatin or cyclophosphamide, doxorubicin, and cisplatin in women with ovarian cancer: the ICON3 randomised trial. *Lancet* 2002; 360: 505–515
- 122 McGuire WP *et al.* Cyclophosphamide and cisplatin compared with paclitaxel and cisplatin in patients with stage III and stage IV ovarian cancer. *N Engl J Med* 1996; 334: 1–6
- 123 Muggia FM *et al.* Phase III randomized study of cisplatin versus paclitaxel versus cisplatin and paclitaxel in patients with suboptimal stage III or IV ovarian cancer: a gynecologic oncology group study. *J Clin Oncol* 2000; 18: 106–115
- 124 Neijt JP *et al.* Exploratory phase III study of paclitaxel and cisplatin versus paclitaxel and carboplatin in advanced ovarian cancer. *J Clin Oncol* 2000; 18: 3084–3092
- 125 Piccart MJ *et al.* Randomized intergroup trial of cisplatin-paclitaxel versus cisplatin-cyclophosphamide in women with advanced epithelial ovarian cancer: three-year results. *J Natl Cancer Inst* 2000; 92: 699–708
- 126 West RJ, Zweig SF. Meta-analysis of chemotherapy regimens for ovarian carcinoma: a reassessment of cisplatin, cyclophosphamide and doxorubicin versus cisplatin and cyclophosphamide. *Eur J Gynaecol Oncol* 1997; 18: 343–348
- 127 Ozols RF. Chemotherapy for ovarian cancer. *Semin Oncol* 1999; 26 (6 Suppl. 18): 34–40
- 128 du Bois A, Neijt JP, Thigpen JT. First line chemotherapy with carboplatin plus paclitaxel in advanced ovarian cancer – a new standard of care? *Ann Oncol* 1999; 10 (Suppl. 1): 35–41
- 129 Aabo K *et al.* Chemotherapy in advanced ovarian cancer: four systematic meta-analyses of individual patient data from 37 randomized trials. Advanced Ovarian Cancer Trialists' Group. *Br J Cancer* 1998; 78: 1479–1487
- 130 du Bois A *et al.* A randomized clinical trial of cisplatin/paclitaxel versus carboplatin/paclitaxel as first-line treatment of ovarian cancer. *J Natl Cancer Inst* 2003; 95: 1320–1329
- 131 Ozols RF *et al.* Phase III trial of carboplatin and paclitaxel compared with cisplatin and paclitaxel in patients with optimally resected stage III ovarian cancer: a Gynecologic Oncology Group study. *J Clin Oncol* 2003; 21: 3194–3200
- 132 Burger RA *et al.* Incorporation of bevacizumab in the primary treatment of ovarian cancer. *N Engl J Med* 2011; 365: 2473–2483
- 133 Perren TJ *et al.* A phase 3 trial of bevacizumab in ovarian cancer. *N Engl J Med* 2011; 365: 2484–2496
- 134 McGuire WP 3rd. High-dose chemotherapeutic approaches to ovarian cancer management. *Semin Oncol* 2000; 27(3 Suppl. 7): 41–46
- 135 Mobus V *et al.* Phase III trial of high-dose sequential chemotherapy with peripheral blood stem cell support compared with standard dose chemotherapy for first-line treatment of advanced ovarian cancer: intergroup trial of the AGO-Ovar/AIO and EBMT. *J Clin Oncol* 2007; 25: 4187–4193
- 136 Katsumata N *et al.* Dose-dense paclitaxel once a week in combination with carboplatin every 3 weeks for advanced ovarian cancer: a phase 3, open-label, randomised controlled trial. *Lancet* 2009; 374: 1331–1338
- 137 Hoskins P *et al.* Advanced ovarian cancer: phase III randomized study of sequential cisplatin-topotecan and carboplatin-paclitaxel vs. carboplatin-paclitaxel. *J Natl Cancer Inst* 2010; 102: 1547–1556
- 138 Jaaback K, Johnson N. Intraperitoneal chemotherapy for the initial management of primary epithelial ovarian cancer. *Cochrane Database Syst Rev* 2006; (1): CD005340
- 139 Buyse M *et al.* Using the expected survival to explain differences between the results of randomized trials: a case in advanced ovarian cancer. *J Clin Oncol* 2003; 21: 1682–1687
- 140 Aravantinos G *et al.* Paclitaxel plus carboplatin versus paclitaxel plus alternating carboplatin and cisplatin for initial treatment of advanced ovarian cancer: long-term efficacy results: a Hellenic Cooperative Oncology Group (HeCOG) study. *Ann Oncol* 2005; 16: 1116–1122
- 141 Dizon DS *et al.* Two for good measure: six versus eight cycles of carboplatin and paclitaxel as adjuvant treatment for epithelial ovarian cancer. *Gynecol Oncol* 2006; 100: 417–421
- 142 Armstrong DK *et al.* Intraperitoneal cisplatin and paclitaxel in ovarian cancer. *N Engl J Med* 2006; 354: 34–43
- 143 Grenman S *et al.* A randomised phase III study comparing high-dose chemotherapy to conventionally dosed chemotherapy for stage III ovarian cancer: the Finnish Ovarian Cancer (FINOVA) study. *Eur J Cancer* 2006; 42: 2196–2199

- 144 Spriggs DR *et al.* Phase III randomized trial of intravenous cisplatin plus a 24- or 96-hour infusion of paclitaxel in epithelial ovarian cancer: a Gynecologic Oncology Group Study. *J Clin Oncol* 2007; 25: 4466–4471
- 145 Lhomme C *et al.* Phase III study of valspodar (PSC833) combined with paclitaxel and carboplatin compared with paclitaxel and carboplatin alone in patients with stage IV or suboptimally debulked stage III epithelial ovarian cancer or primary peritoneal cancer. *J Clin Oncol* 2008; 26: 2674–2682
- 146 Saffra T *et al.* Combined weekly carboplatin and paclitaxel as primary treatment of advanced epithelial ovarian carcinoma. *Gynecol Oncol* 2009; 114: 215–218
- 147 Lambert HE *et al.* A randomized trial of five versus eight courses of cisplatin or carboplatin in advanced epithelial ovarian carcinoma. A North Thames Ovary Group Study. *Ann Oncol* 1997 8: 327–333
- 148 Sorbe B; Swedish-Norwegian Ovarian Cancer Study Group. Consolidation treatment of advanced (FIGO stage III) ovarian carcinoma in complete surgical remission after induction chemotherapy: a randomized, controlled, clinical trial comparing whole abdominal radiotherapy, chemotherapy, and no further treatment. *Int J Gynecol Cancer* 2003; 13: 278–286
- 149 Mei L *et al.* Maintenance chemotherapy for ovarian cancer. *Cochrane Database Syst Rev* 2010; (9): CD007414
- 150 Berek J *et al.* Oregovomab maintenance monoimmunotherapy does not improve outcomes in advanced ovarian cancer. *J Clin Oncol* 2009; 27: 418–425
- 151 Pecorelli S *et al.* Phase III trial of observation versus six courses of paclitaxel in patients with advanced epithelial ovarian cancer in complete response after six courses of paclitaxel/platinum-based chemotherapy: final results of the After-6 protocol 1. *J Clin Oncol* 2009; 27: 4642–4648
- 152 Penson RT *et al.* Phase II study of carboplatin, paclitaxel, and bevacizumab with maintenance bevacizumab as first-line chemotherapy for advanced mullerian tumors. *J Clin Oncol* 2010; 28: 154–159
- 153 Pomel C *et al.* Hyperthermic intra-peritoneal chemotherapy using oxaliplatin as consolidation therapy for advanced epithelial ovarian carcinoma. Results of a phase II prospective multicentre trial. CHIPOVAC study. *Eur J Surg Oncol* 2010; 36: 589–593
- 154 Hess LM *et al.* Continued chemotherapy after complete response to primary therapy among women with advanced ovarian cancer: a meta-analysis. *Cancer* 2010; 116: 5251–5260
- 155 Williams C, Simera I, Bryant A. Tamoxifen for relapse of ovarian cancer. *Cochrane Database Syst Rev* 2010; (3): CD001034
- 156 ten Bokkel Huinink W *et al.* Topotecan versus paclitaxel for the treatment of recurrent epithelial ovarian cancer. *J Clin Oncol* 1997; 15: 2183–2193
- 157 Parmar MK *et al.* Paclitaxel plus platinum-based chemotherapy versus conventional platinum-based chemotherapy in women with relapsed ovarian cancer: the ICON4/AGO-OVAR-2.2 trial. *Lancet* 2003; 361: 2099–2106
- 158 Gordon AN *et al.* Recurrent epithelial ovarian carcinoma: a randomized phase III study of pegylated liposomal doxorubicin versus topotecan. *J Clin Oncol* 2001; 19: 3312–3322
- 159 Cantu MG *et al.* Randomized controlled trial of single-agent paclitaxel versus cyclophosphamide, doxorubicin, and cisplatin in patients with recurrent ovarian cancer who responded to first-line platinum-based regimens. *J Clin Oncol* 2002; 20: 1232–1237
- 160 Blackledge G *et al.* Response of patients in phase II studies of chemotherapy in ovarian cancer: implications for patient treatment and the design of phase II trials. *Br J Cancer* 1989; 59: 650–653
- 161 Eisenhauer EA *et al.* New response evaluation criteria in solid tumours: revised RECIST guideline (version 1.1). *Eur J Cancer* 2009; 45: 228–247
- 162 Rustin GJ *et al.* Definitions for response and progression in ovarian cancer clinical trials incorporating RECIST 1.1 and CA 125 agreed by the Gynecological Cancer Intergroup (GCGI). *Int J Gynecol Cancer* 2011; 21: 419–423
- 163 Friedlander M *et al.*; Gynecologic Cancer InterGroup. Clinical trials in recurrent ovarian cancer. *Int J Gynecol Cancer* 2011; 21: 771–775
- 164 Meier W *et al.* Topotecan versus treosulfan, an alkylating agent, in patients with epithelial ovarian cancer and relapse within 12 months following 1st-line platinum/paclitaxel chemotherapy. A prospectively randomized phase III trial by the Arbeitsgemeinschaft Gynaekologische Onkologie Ovarian Cancer Study Group (AGO-OVAR). *Gynecol Oncol* 2009; 114: 199–205
- 165 ten Bokkel Huinink W, Lane SR, Ross GA. Long-term survival in a phase III, randomised study of topotecan versus paclitaxel in advanced epithelial ovarian carcinoma. *Ann Oncol* 2004; 15: 100–103
- 166 Vergote I *et al.* Phase 3 randomised study of canfosfamide (Telcyta, TLK286) versus pegylated liposomal doxorubicin or topotecan as third-line therapy in patients with platinum-refractory or -resistant ovarian cancer. 2009 (1879-0852 [Electronic])
- 167 Ferrandina G *et al.* Phase III trial of gemcitabine compared with pegylated liposomal doxorubicin in progressive or recurrent ovarian cancer. *J Clin Oncol* 2008; 26: 890–896
- 168 Mutch DG *et al.* Randomized phase III trial of gemcitabine compared with pegylated liposomal doxorubicin in patients with platinum-resistant ovarian cancer. *J Clin Oncol* 2007; 25: 2811–2818
- 169 du Bois A *et al.* Chemotherapy versus hormonal treatment in platinum- and paclitaxel-refractory ovarian cancer: a randomised trial of the German Arbeitsgemeinschaft Gynaekologische Onkologie (AGO) Study Group Ovarian Cancer. *Ann Oncol* 2002; 13: 251–257
- 170 Sehouli J *et al.* Nonplatinum topotecan combinations versus topotecan alone for recurrent ovarian cancer: results of a phase III study of the North-Eastern German Society of Gynecological Oncology Ovarian Cancer Study Group. *J Clin Oncol* 2008; 26: 3176–3182
- 171 Peng LH, Chen XY, Wu TX. Topotecan for ovarian cancer. *Cochrane Database Syst Rev* 2008; 2: CD005589; DOI: 10.1002/14651858.CD005589.pub2
- 172 Eisenkop SM, Friedman RL, Spirtos NM. The role of secondary cytoreductive surgery in the treatment of patients with recurrent epithelial ovarian carcinoma. *Cancer* 2000; 88: 144–153
- 173 Harter P *et al.*; Arbeitsgemeinschaft Gynaekologische Onkologie Ovarian Committee; AGO Ovarian Cancer Study Group. Surgery in recurrent ovarian cancer: the Arbeitsgemeinschaft Gynaekologische Onkologie (AGO) DESKTOP OVAR trial. *Ann Surg Oncol* 2006; 13: 1702–1710
- 174 Sehouli J *et al.* Role of secondary cytoreductive surgery in ovarian cancer relapse: who will benefit? A systematic analysis of 240 consecutive patients. *J Surg Oncol* 2010; 102: 656–662
- 175 Galaal K *et al.* Cytoreductive surgery plus chemotherapy versus chemotherapy alone for recurrent epithelial ovarian cancer. *Cochrane Database Syst Rev* 2010; (6): CD007822
- 176 Bristow RE, Puri I, Chi DS. Cytoreductive surgery for recurrent ovarian cancer: a meta-analysis. *Gynecol Oncol* 2009; 112: 265–274
- 177 Harter P *et al.* Prospective validation study of a predictive score for operability of recurrent ovarian cancer: the Multicenter Intergroup Study DESKTOP II. A project of the AGO Kommission OVAR, AGO Study Group, NOGGO, AGO-Austria, and MITO. *Int J Gynecol Cancer* 2011; 21: 289–295
- 178 Kew F *et al.* Evaluation of follow-up strategies for patients with epithelial ovarian cancer following completion of primary treatment. *Cochrane Database Syst Rev* 2011; (6): CD006119
- 179 Gadducci A *et al.* Surveillance procedures for patients treated for epithelial ovarian cancer: a review of the literature. *Int J Gynecol Cancer* 2007; 17: 21–31
- 180 Guidozi F, Daponte A. Estrogen replacement therapy for ovarian carcinoma survivors: A randomized controlled trial. *Cancer* 1999; 86: 1013–1018
- 181 Eeles RA *et al.* Hormone replacement therapy and survival after surgery for ovarian cancer. *BMJ* 1991; 302: 259–262
- 182 Ursic-Vrscaj M, Bebar S, Zakelj MP. Hormone replacement therapy after invasive ovarian serous cystadenocarcinoma treatment: the effect on survival. *Menopause* 2001; 8: 70–75
- 183 Mascarenhas C *et al.* Use of hormone replacement therapy before and after ovarian cancer diagnosis and ovarian cancer survival. *Int J Cancer* 2006; 119: 2907–2915
- 184 WHO. Classification of Tumours. Pathology and Genetics of Tumours of the Breast and female genital Organs. 3rd ed. Switzerland: WHO-Press; 2003
- 185 Kaern J, Trope CG, Abeler VM. A retrospective study of 370 borderline tumors of the ovary treated at the Norwegian Radium Hospital from 1970 to 1982. A review of clinicopathologic features and treatment modalities. *Cancer* 1993; 71: 1810–1820
- 186 Leake JF *et al.* Long-term follow-up of serous ovarian tumors of low malignant potential. *Gynecol Oncol* 1992; 47: 150–158
- 187 Odegaard E *et al.* Surgery of borderline tumors of the ovary: retrospective comparison of short-term outcome after laparoscopy or laparotomy. *Acta Obstet Gynecol Scand* 2007; 86: 620–626

- 188 Camatte S *et al.* Impact of surgical staging in patients with macroscopic "stage I" ovarian borderline tumours: analysis of a continuous series of 101 cases. *Eur J Cancer* 2004; 40: 1842–1849
- 189 Menczer J, Chetrit A, Sadetzki S. The effect of hysterectomy on survival of patients with borderline ovarian tumors. *Gynecol Oncol* 2012; 125: 372–375
- 190 du Bois A, Ewald-Riegler N. Borderline-Tumoren des Ovars – eine systematische Übersicht. *Geburtsh Frauenheilk* 2009; 69: 807–833
- 191 Morice P *et al.* Recommendations of the Fertility Task Force of the European Society of Gynecologic Oncology about the conservative management of ovarian malignant tumors. *Int J Gynecol Cancer* 2011; 21: 951–963
- 192 Faluy O *et al.* Interventions for the treatment of borderline ovarian tumours. *Cochrane Database Syst Rev* 2010; (9): CD007696
- 193 Miller BE *et al.* Prognostic factors in adult granulosa cell tumor of the ovary. *Cancer* 1997; 79: 1951–1955
- 194 Nosov V *et al.* Predictors of recurrence of ovarian granulosa cell tumors. *Int J Gynecol Cancer* 2009; 19: 628–633
- 195 Colombo N *et al.* Management of ovarian stromal cell tumors. *J Clin Oncol* 2007; 25: 2944–2951
- 196 Sehouli J *et al.* Granulosa cell tumor of the ovary: 10 years follow-up data of 65 patients. *Anticancer Res* 2004; 24 (2C): 1223–1229
- 197 Zanagnolo V, Pasinetti B, Sartori E. Clinical review of 63 cases of sex cord stromal tumors. *Eur J Gynaecol Oncol* 2004; 25: 431–438
- 198 Evans AT 3rd *et al.* Clinicopathologic review of 118 granulosa and 82 theca cell tumors. *Obstet Gynecol* 1980; 55: 231–238
- 199 Zhang M *et al.* Prognostic factors responsible for survival in sex cord stromal tumors of the ovary – an analysis of 376 women. *Gynecol Oncol* 2007; 104: 396–400
- 200 Fotopoulou C *et al.* Adult granulosa cell tumors of the ovary: tumor dissemination pattern at primary and recurrent situation, surgical outcome. *Gynecol Oncol* 2010; 119: 285–290
- 201 Zambetti M *et al.* cis-platinum/vinblastine/bleomycin combination chemotherapy in advanced or recurrent granulosa cell tumors of the ovary. *Gynecol Oncol* 1990; 36: 317–320
- 202 Colombo N *et al.* Cisplatin, vinblastine, and bleomycin combination chemotherapy in metastatic granulosa cell tumor of the ovary. *Obstet Gynecol* 1986; 67: 265–268
- 203 Mahdi H *et al.* Prognostic impact of lymphadenectomy in clinically early stage malignant germ cell tumour of the ovary. *Br J Cancer* 2011; 105: 493–497
- 204 Gershenson DM. Management of ovarian germ cell tumors. *J Clin Oncol* 2007; 25: 2938–2943.
- 205 Pectasides D, Pectasides E, Kassanos D. Germ cell tumors of the ovary. *Cancer Treat Rev* 2008; 34: 427–441
- 206 Kumar S *et al.* The prevalence and prognostic impact of lymph node metastasis in malignant germ cell tumors of the ovary. *Gynecol Oncol* 2008; 110: 125–132
- 207 Oltmann SC *et al.* Pediatric ovarian malignancies: how efficacious are current staging practices? *J Pediatr Surg* 2010; 45: 1096–1102
- 208 Gobel U *et al.* Treatment of germ cell tumors in children: results of European trials for testicular and non-testicular primary sites. *Crit Rev Oncol Hematol* 1990; 10: 89–98
- 209 Marina NM *et al.* Complete surgical excision is effective treatment for children with immature teratomas with or without malignant elements: a Pediatric Oncology Group/Children's Cancer Group Intergroup Study. *J Clin Oncol* 1999; 17: 2137–2143
- 210 Gershenson DM *et al.* Second-look laparotomy in the management of malignant germ cell tumors of the ovary. *Obstet Gynecol* 1986; 67: 789–793
- 211 Billmire D *et al.* Outcome and staging evaluation in malignant germ cell tumors of the ovary in children and adolescents: an intergroup study. *J Pediatr Surg* 2004; 39: 424–429; discussion 424–429
- 212 Beiner ME *et al.* Cystectomy for immature teratoma of the ovary. *Gynecol Oncol* 2004; 93: 381–384
- 213 Cushing B *et al.* Surgical resection alone is effective treatment for ovarian immature teratoma in children and adolescents: a report of the Pediatric Oncology Group and the Children's Cancer Group. *Am J Obstet Gynecol* 1999; 181: 353–358
- 214 Kang H *et al.* Outcome and reproductive function after cumulative high-dose combination chemotherapy with bleomycin, etoposide and cisplatin (BEP) for patients with ovarian endodermal sinus tumor. *Gynecol Oncol* 2008; 111: 106–110
- 215 Chan JK *et al.* Association of lymphadenectomy and survival in stage I ovarian cancer patients. *Obstet Gynecol* 2007; 109: 12–19
- 216 Kim HS *et al.* Systematic lymphadenectomy for survival in epithelial ovarian cancer: a meta-analysis. *Int J Gynecol Cancer* 2010; 20: 520–528
- 217 Maggioni A *et al.* Randomised study of systematic lymphadenectomy in patients with epithelial ovarian cancer macroscopically confined to the pelvis. *Br J Cancer* 2006; 95: 699–704
- 218 Suzuki S *et al.* Is there any association between retroperitoneal lymphadenectomy and survival benefit in ovarian clear cell carcinoma patients? *Ann Oncol* 2008; 19: 1284–1287
- 219 Yang X *et al.* Prognosis in epithelial ovarian cancer: clinical analysis of 287 pelvic and para-aortic lymphadenectomy. *Chinese-German Journal of Clinical Oncology* 2007; 6: 492–496
- 220 Yokoyama Y *et al.* Evaluation of cytoreductive surgery with pelvic and paraaortic lymphadenectomy and intermittent cisplatin-based combination chemotherapy for improvement of long-term survival in ovarian cancer. *Eur J Gynaecol Oncol* 1999; 20: 361–366
- 221 Young RC *et al.* Staging laparotomy in early ovarian cancer. *JAMA* 1983; 250: 3072–3076
- 222 Piver MS, Barlow JJ, Lele SB. Incidence of subclinical metastasis in stage I and II ovarian carcinoma. *Obstet Gynecol* 1978; 52: 100–104
- 223 Buchsbaum HJ *et al.* Surgical staging of carcinoma of the ovaries. *Surg Gynecol Obstet* 1989; 169: 226–232
- 224 Griffiths CT. Surgical resection of tumor bulk in the primary treatment of ovarian carcinoma. *Natl Cancer Inst Monogr* 1975; 42: 101–104
- 225 Hoskins WJ *et al.* The influence of cytoreductive surgery on recurrence-free interval and survival in small-volume stage III epithelial ovarian cancer: a Gynecologic Oncology Group study. *Gynecol Oncol* 1992; 47: 159–166
- 226 Hacker NF *et al.* Primary cytoreductive surgery for epithelial ovarian cancer. *Obstet Gynecol* 1983; 61: 413–420
- 227 Hunter RW, Alexander ND, Soutter WP. Meta-analysis of surgery in advanced ovarian carcinoma: is maximum cytoreductive surgery an independent determinant of prognosis? *Am J Obstet Gynecol* 1992; 166: 504–511
- 228 Allen DG, Heintz AP, Touw FW. A meta-analysis of residual disease and survival in stage III and IV carcinoma of the ovary. *Eur J Gynaecol Oncol* 1995; 16: 349–356
- 229 Voest EE, van Houtvelingen JC, Neijt JP. A meta-analysis of prognostic factors in advanced ovarian cancer with median survival and overall survival (measured with the log (relative risk) as main objectives. *Eur J Cancer Clin Oncol* 1989; 25: 711–720
- 230 Nguyen HN *et al.* National survey of ovarian carcinoma. Part V. The impact of physician's specialty on patients' survival. *Cancer* 1993; 72: 3663–3670
- 231 Junor EJ *et al.* Specialist gynaecologists and survival outcome in ovarian cancer: a Scottish national study of 1866 patients. *Br J Obstet Gynaecol* 1999; 106: 1130–1136
- 232 Bristow RE *et al.* Survival effect of maximal cytoreductive surgery for advanced ovarian carcinoma during the platinum era: a meta-analysis. *J Clin Oncol* 2002; 20: 1248–1259
- 233 Elattar A *et al.* Optimal primary surgical treatment for advanced epithelial ovarian cancer. *Cochrane Database Syst Rev* 2011; (8): CD007565
- 234 Ang C *et al.* Ultra-radical (extensive) surgery versus standard surgery for the primary cytoreduction of advanced epithelial ovarian cancer. *Cochrane Database Syst Rev* 2011; 4: CD007697
- 235 Bashir S *et al.* Surgical technique of diaphragm full-thickness resection and trans-diaphragmatic decompression of pneumothorax during cytoreductive surgery for ovarian cancer. *Gynecol Oncol* 2010; 119: 255–258
- 236 Sehouli J *et al.* Primary versus interval debulking surgery in advanced ovarian cancer: results from a systematic single-center analysis. *Int J Gynecol Cancer* 2010; 20: 1331–1340
- 237 Pfisterer J *et al.* Gemcitabine plus carboplatin compared with carboplatin in patients with platinum-sensitive recurrent ovarian cancer: an intergroup trial of the AGO-OVAR, the NCIC CTG, and the EORTC GCG. *J Clin Oncol* 2006; 24: 4699–4707
- 238 Pujade-Lauraine E *et al.* Pegylated liposomal doxorubicin and carboplatin compared with paclitaxel and carboplatin for patients with platinum-sensitive ovarian cancer in late relapse. *J Clin Oncol* 2010; 28: 3323–3329
